# Supplementary material for: Mapping the fracture network in the Lilstock pavement, Bristol Channel, UK: manual versus automatic
Source: Copernicus journal article supplement (doi:10.5194/se-11-1773-2020), 2020-09-18
Supplement: Supplementary file 2 [file se-11-1773-2020-supplement.zip]

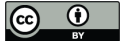

## *Supplement of*

# **Mapping the fracture network in the Lilstock pavement, Bristol Channel, UK: manual versus automatic**

**Christopher Weismüller et al.**

*Correspondence to:* Christopher Weismüller ([c.weismueller@nug.rwth-aachen.de](mailto:c.weismueller@nug.rwth-aachen.de))

- [se-11-1773-2020-supplement-title-page.pdf](#)
- Fracture Shapefiles
  - Auto\_NE1.cpg
  - Auto\_NE1.dbf
  - Auto\_NE1.prj
  - Auto\_NE1.sbn
  - Auto\_NE1.sbx
  - Auto\_NE1.shp
  - Auto\_NE1.shp.xml
  - Auto\_NE1.shx
  - Auto\_NE2.cpg
  - Auto\_NE2.dbf
  - Auto\_NE2.prj
  - Auto\_NE2.sbn
  - Auto\_NE2.sbx
  - Auto\_NE2.shp
  - Auto\_NE2.shp.xml
  - Auto\_NE2.shx
  - Auto\_SW1.cpg
  - Auto\_SW1.dbf
  - Auto\_SW1.prj
  - Auto\_SW1.sbn
  - Auto\_SW1.sbx
  - Auto\_SW1.shp

- Auto\_SW1.shp.xml
- Auto\_SW1.shx
- Auto\_SW2.cpg
- Auto\_SW2.dbf
- Auto\_SW2.prj
- Auto\_SW2.sbn
- Auto\_SW2.sbx
- Auto\_SW2.shp
- Auto\_SW2.shp.xml
- Auto\_SW2.shx
- Auto\_SW3.cpg
- Auto\_SW3.dbf
- Auto\_SW3.prj
- Auto\_SW3.sbn
- Auto\_SW3.sbx
- Auto\_SW3.shp
- Auto\_SW3.shp.xml
- Auto\_SW3.shx
- Manual\_NE1.cpg
- Manual\_NE1.dbf
- Manual\_NE1.prj
- Manual\_NE1.sbn
- Manual\_NE1.sbx
- Manual\_NE1.shp
- Manual\_NE1.shp.xml
- Manual\_NE1.shx
- Manual\_NE2.cpg
- Manual\_NE2.dbf
- Manual\_NE2.prj
- Manual\_NE2.sbn
- Manual\_NE2.sbx
- Manual\_NE2.shp
- Manual\_NE2.shp.xml
- Manual\_NE2.shx
- Manual\_SW1.cpg
- Manual\_SW1.dbf
- Manual\_SW1.prj
- Manual\_SW1.sbn
- Manual\_SW1.sbx
- Manual\_SW1.shp
- Manual\_SW1.shp.xml
- Manual\_SW1.shx

- Manual\_SW2.cpg
- Manual\_SW2.dbf
- Manual\_SW2.prj
- Manual\_SW2.sbn
- Manual\_SW2.sbx
- Manual\_SW2.shp
- Manual\_SW2.shp.xml
- Manual\_SW2.shx
- Manual\_SW3.cpg
- Manual\_SW3.dbf
- Manual\_SW3.prj
- Manual\_SW3.sbn
- Manual\_SW3.sbx
- Manual\_SW3.shp
- Manual\_SW3.shp.xml
- Manual\_SW3.shx
- Supplementary Figures
  - S1\_Ground Truthing.pdf
  - S2\_P20\_all\_NEW.pdf
  - S3\_P20\_differences\_NEW.pdf
  - S4 - SW1.jpg
  - S5 - SW2.jpg
  - S6 - SW3.jpg
  - S7 - NE1.jpg
  - S8 - NE2.jpg

The copyright of individual parts of the supplement might differ from the CC BY 4.0 License.
