# Supplementary material for: Mapping the fracture network in the Lilstock pavement, Bristol Channel, UK: manual versus automatic
Source: Copernicus journal article supplement (doi:10.5194/se-11-1773-2020), 2020-09-18
Supplement: Supplementary file 3 [file se-11-1773-2020-supplement.zip]

Examples of ground truthing using objects of known size:

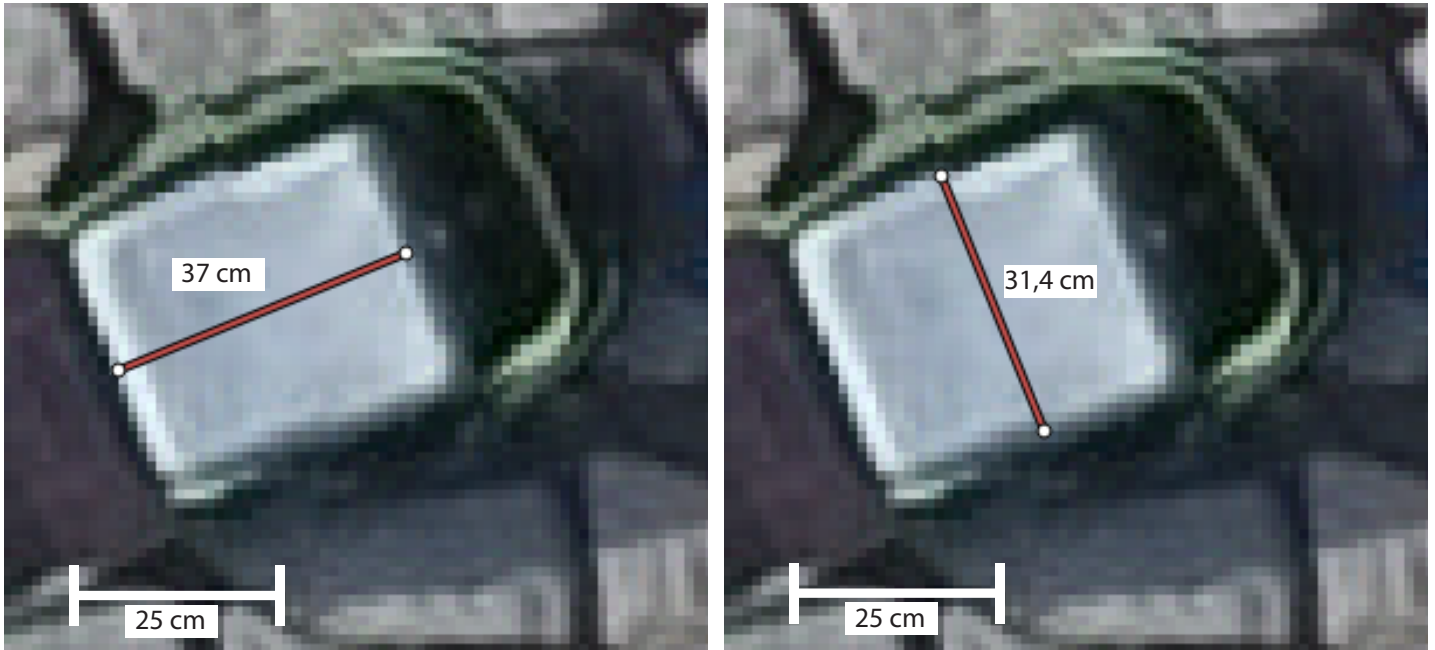

The grey box shown in the orthorectified mosaics above has known dimensions of 37 cm x 31.5 cm. Measurements in the orthorectified mosaics shown above were used to verify their horizontal resolution which is < 1cm/pixel.

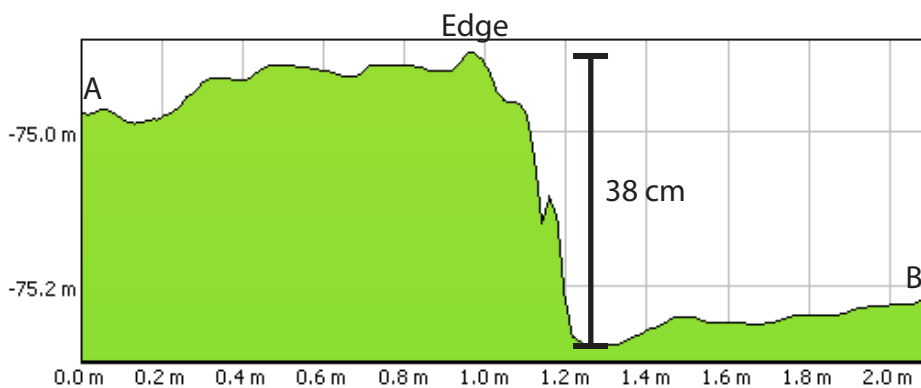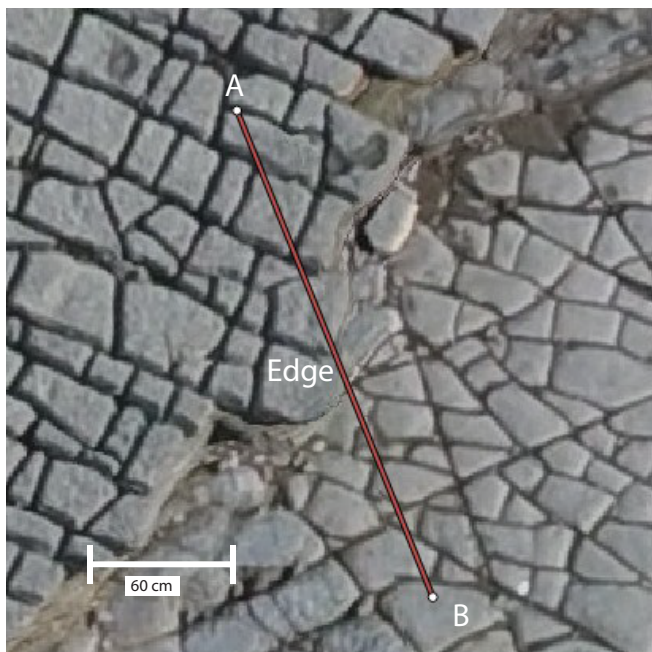

The relative vertical accuracy of the underlying digital elevation model was verified by measuring the thickness of the strata. For the strata shown in the image, ~ 40 cm have been measured on the outcrop. The graph shows the elevation along the profile resulting in a measured thickness of 38 cm, which is in line with the calculated resolution of ~ 2.3 cm/pix in the DEMs.
