# Supplementary figures and images for: Mapping the fracture network in the Lilstock pavement, Bristol Channel, UK: manual versus automatic
Source: Copernicus journal article supplement (doi:10.5194/se-11-1773-2020), 2020-09-18

Manual

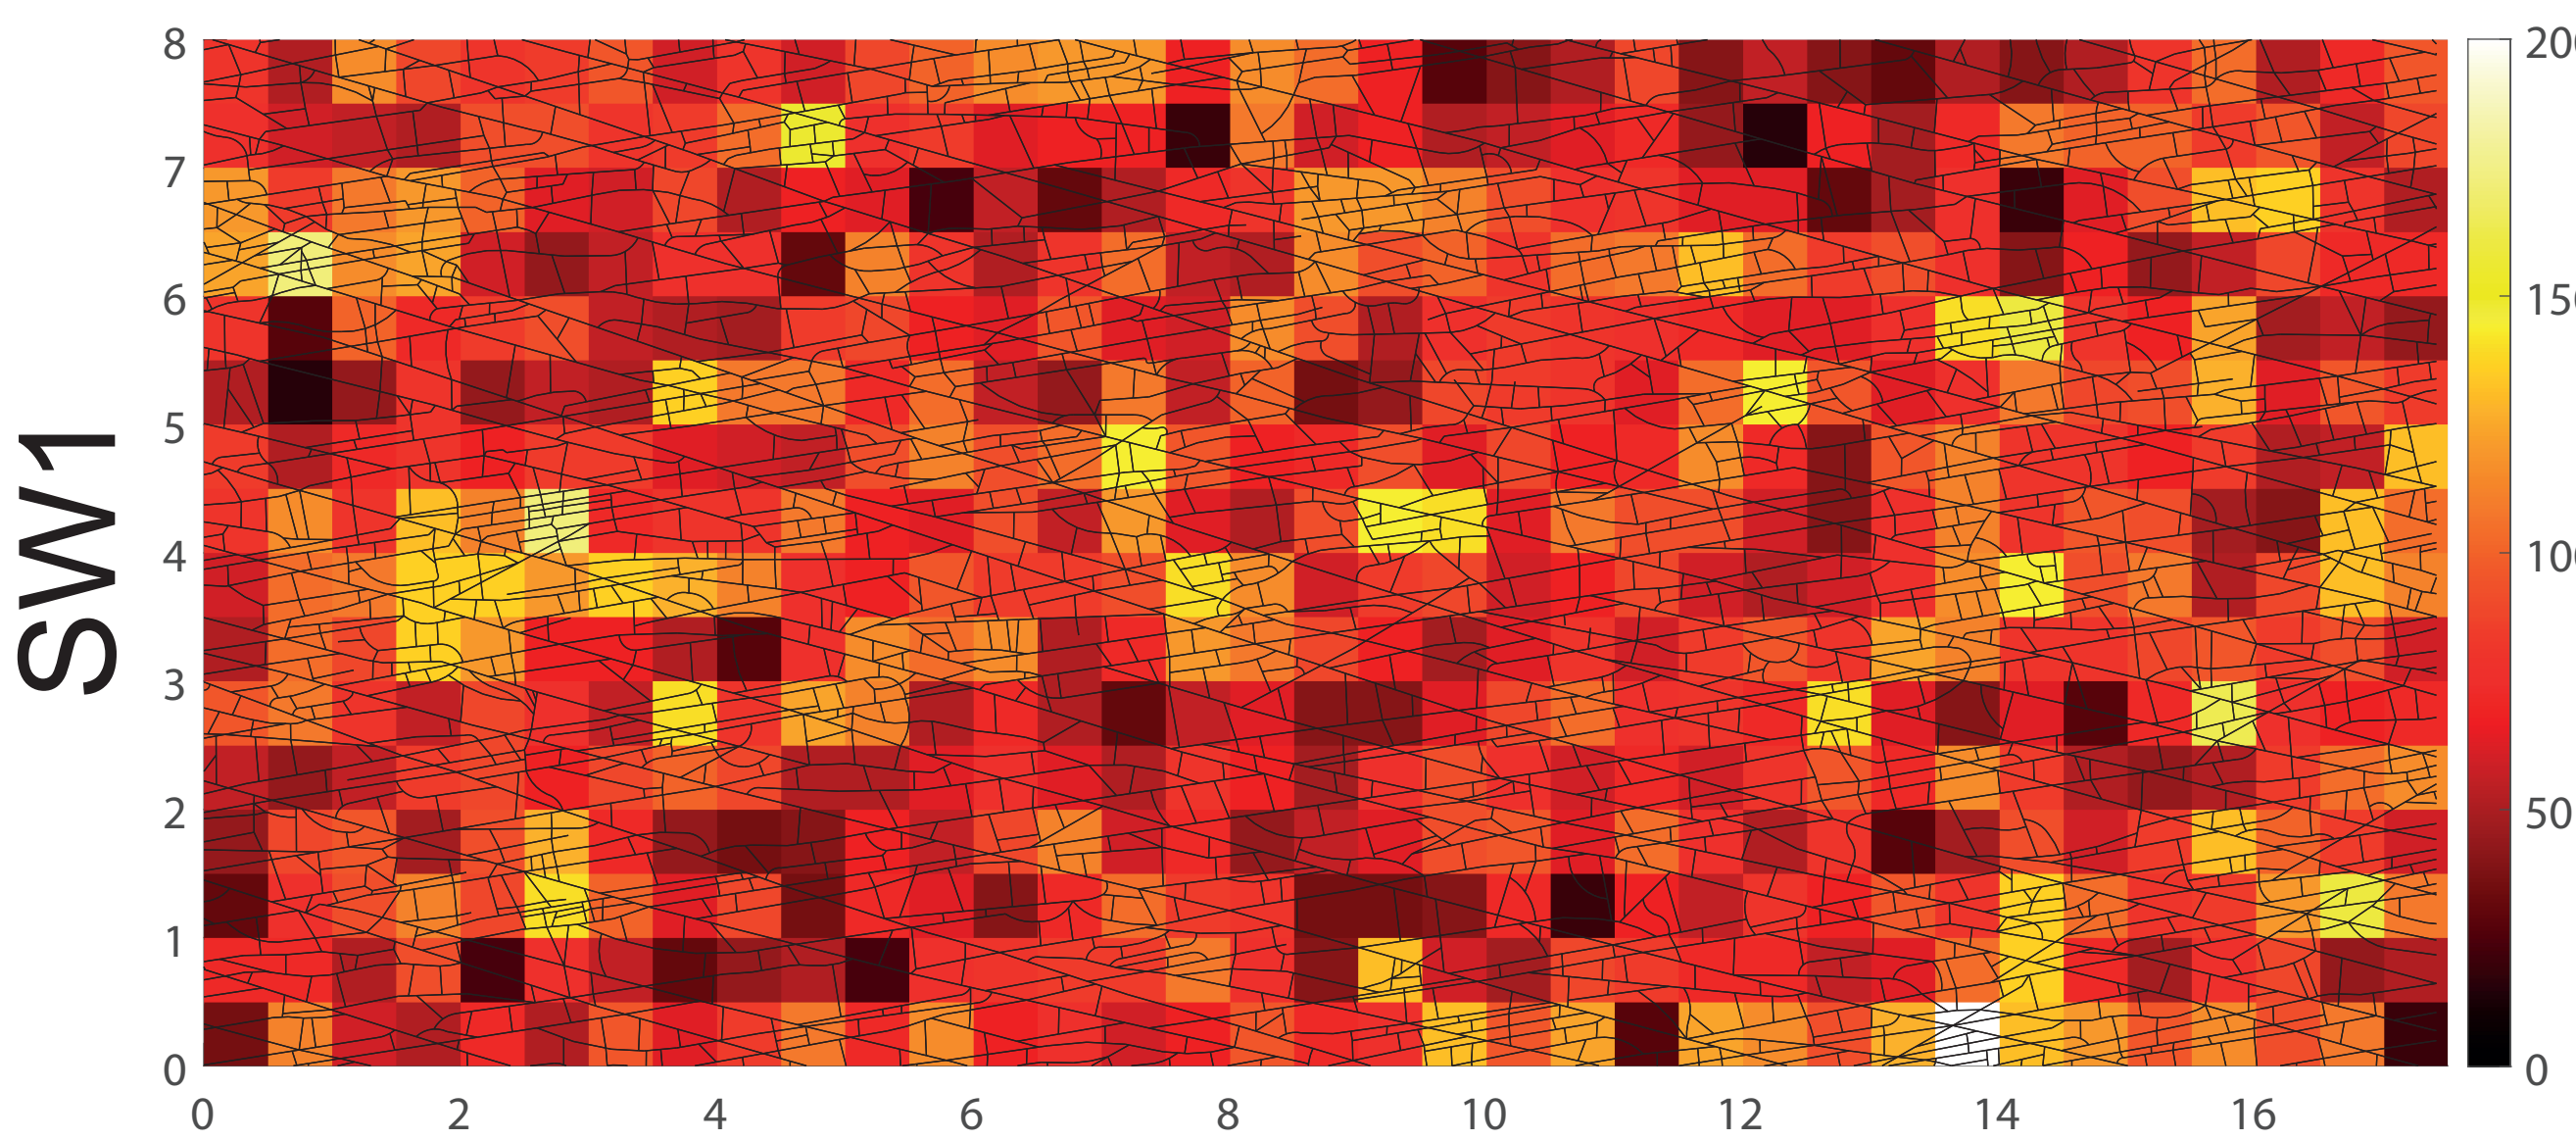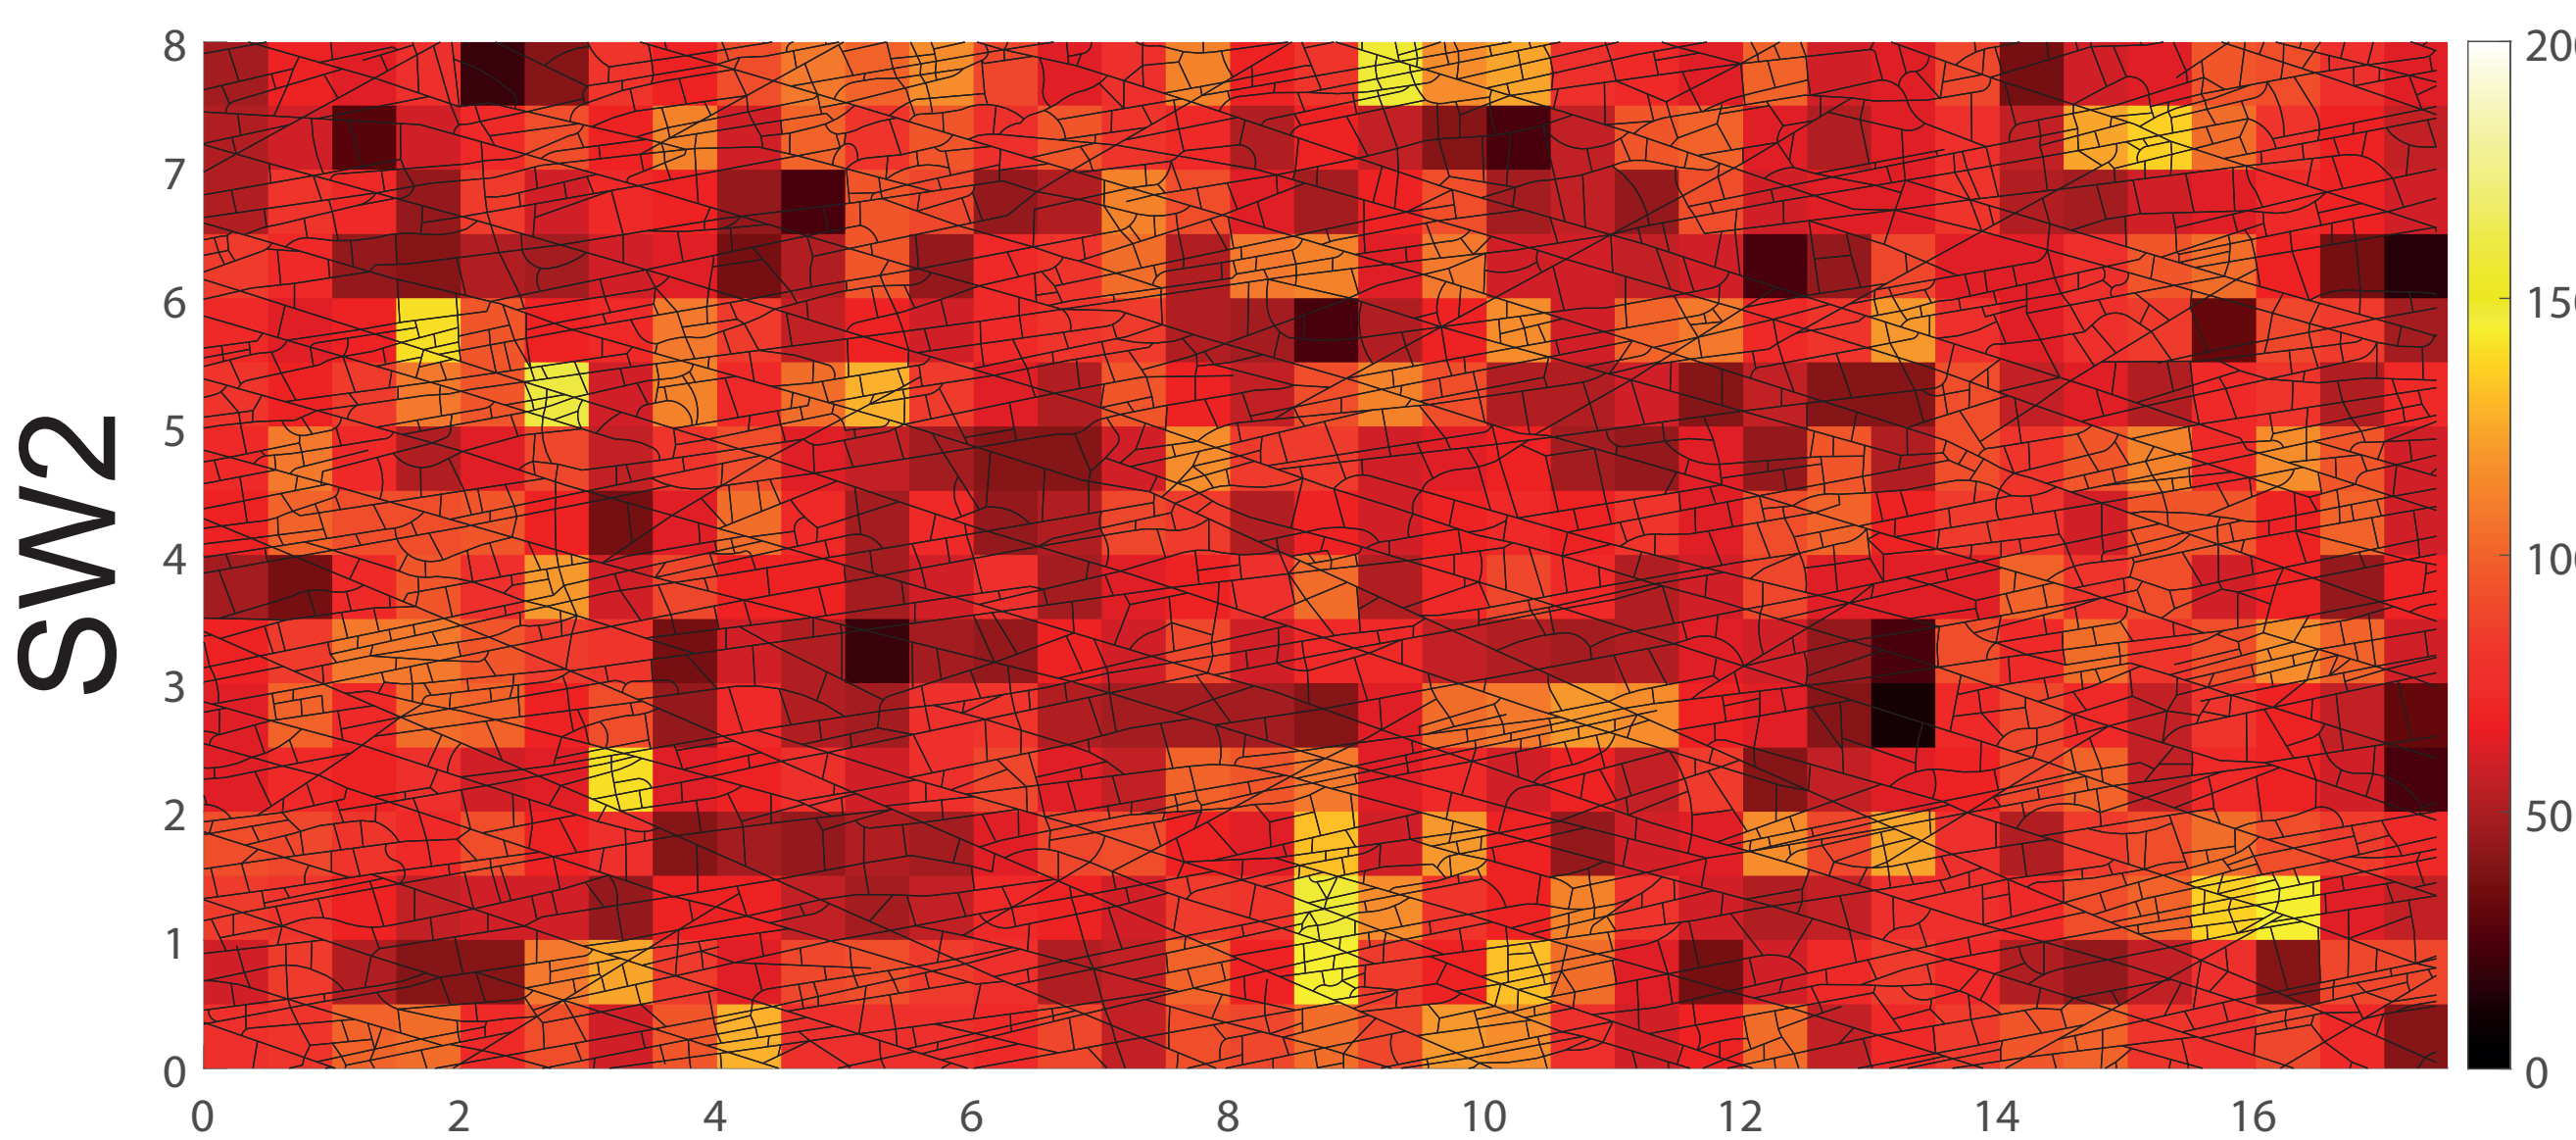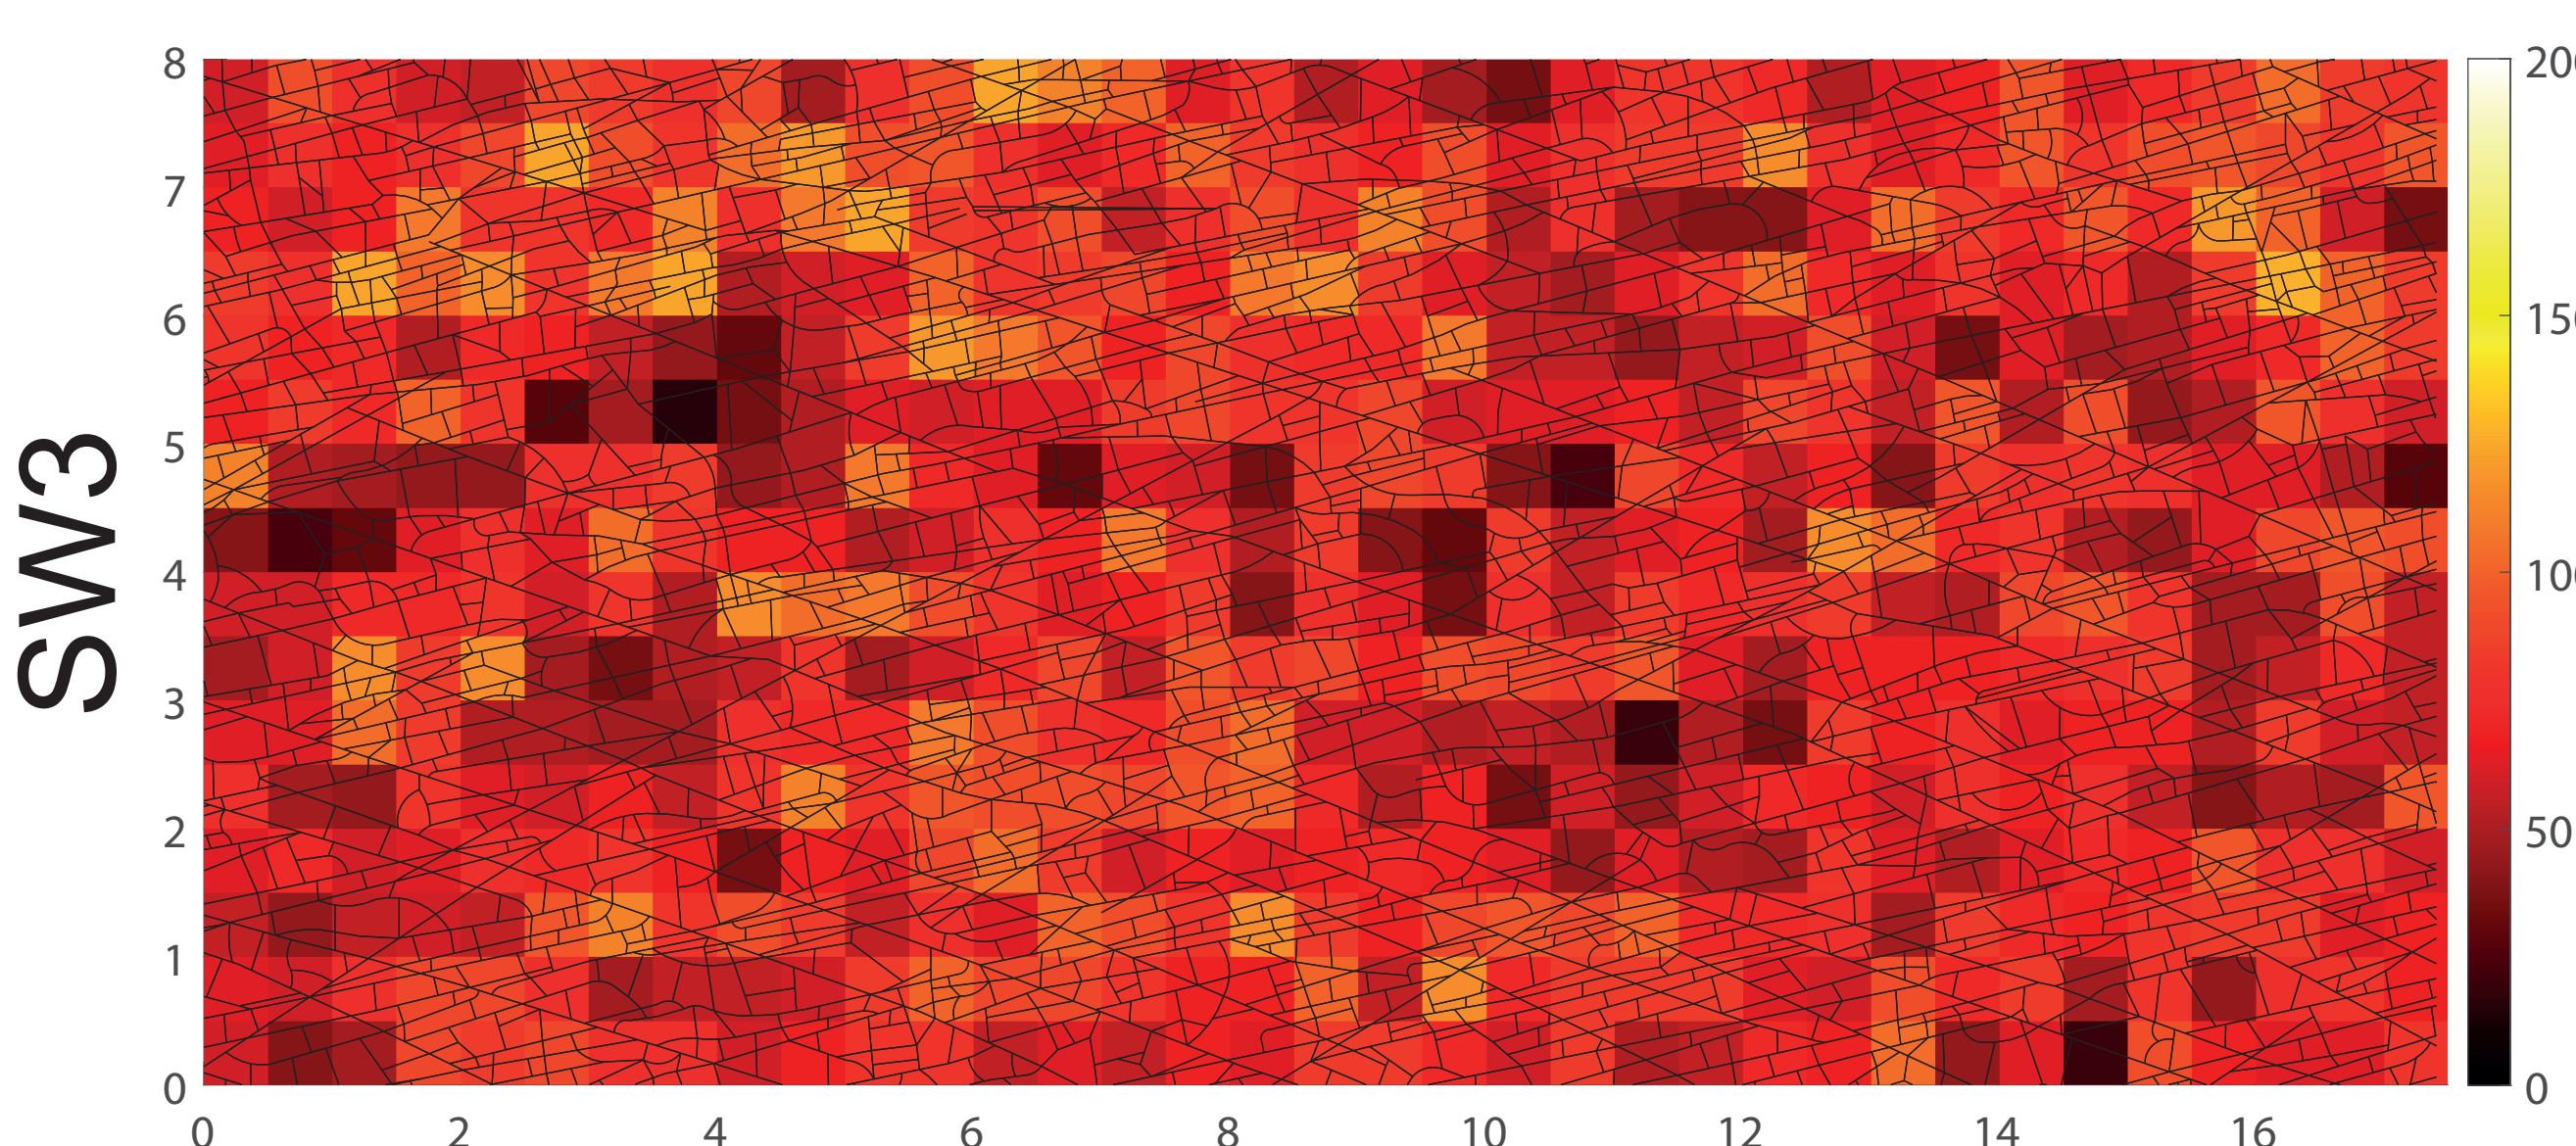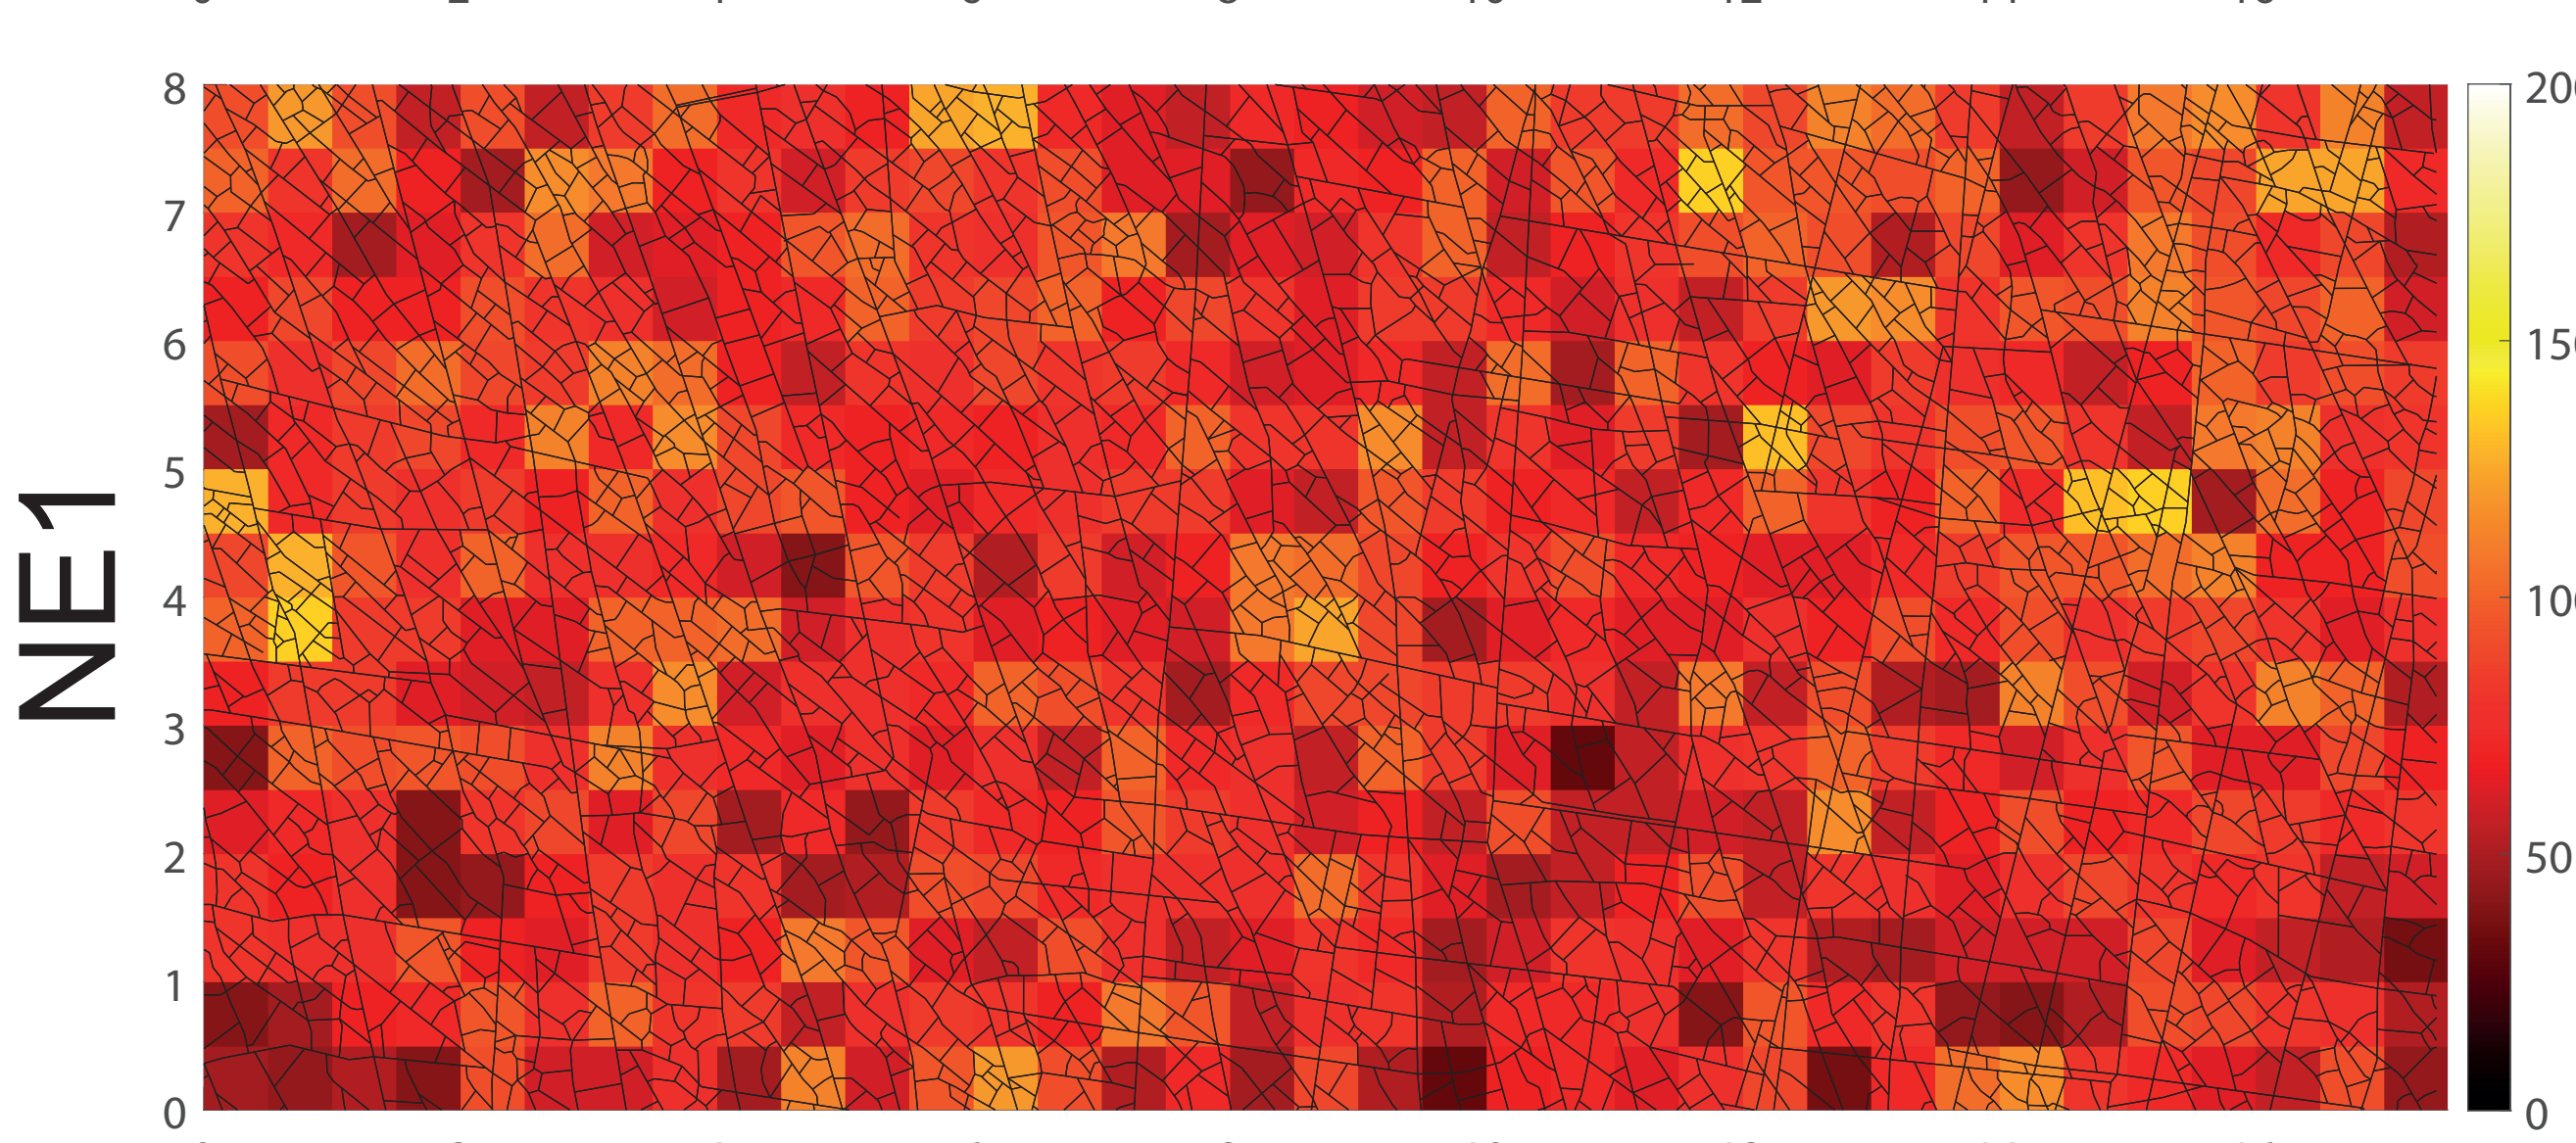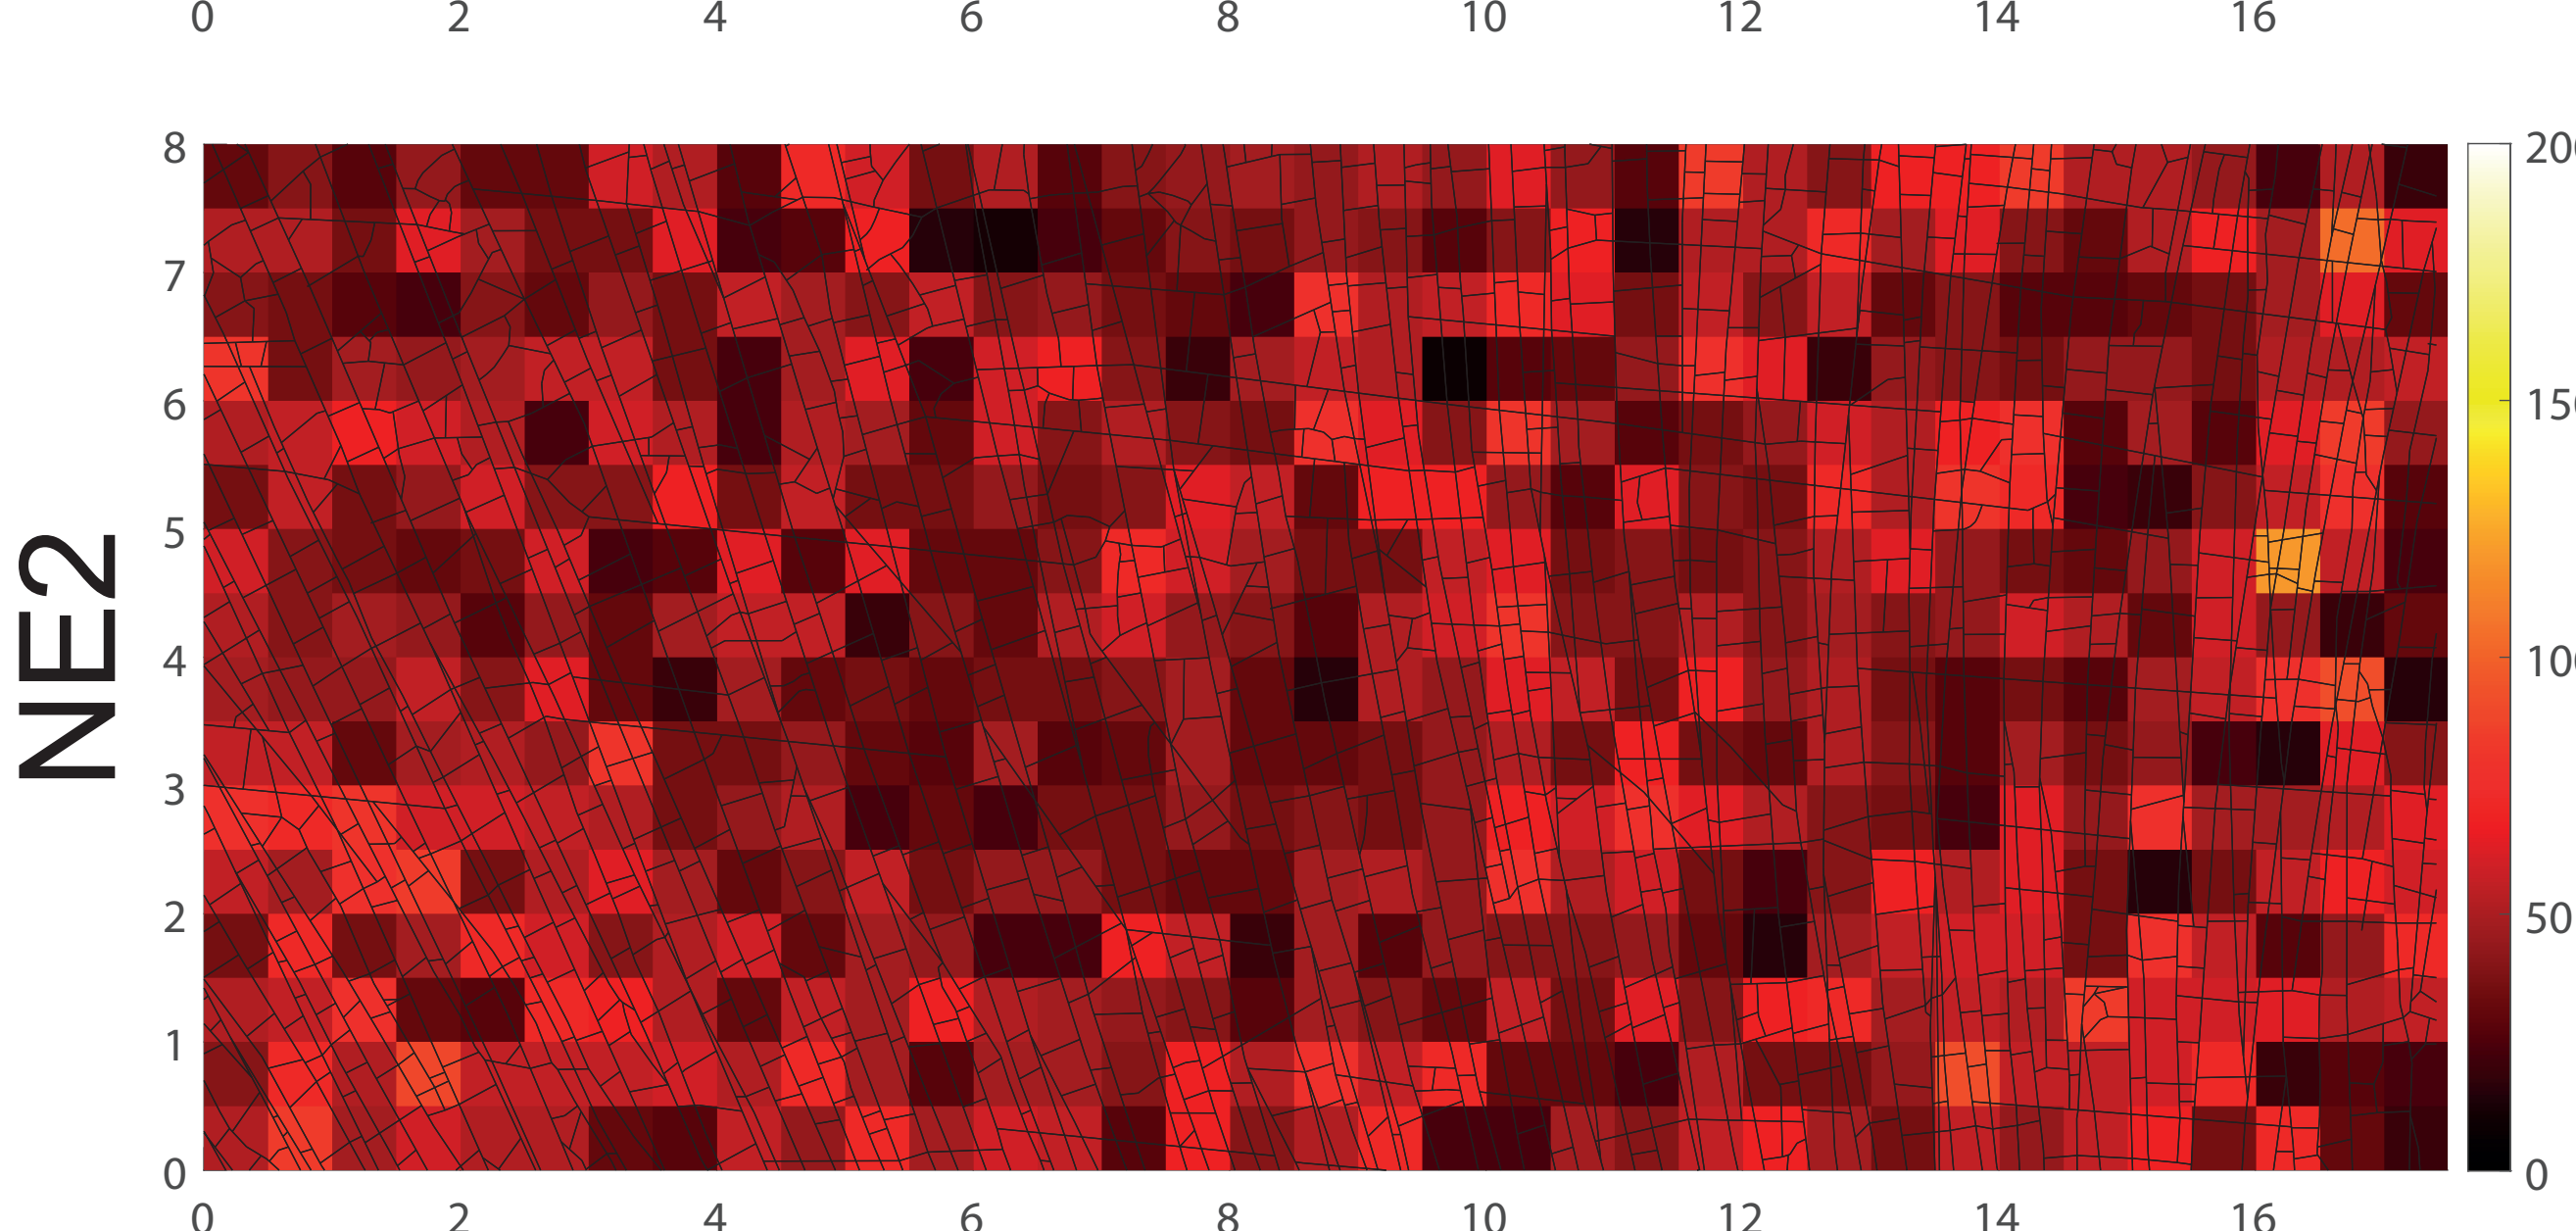

Automatic

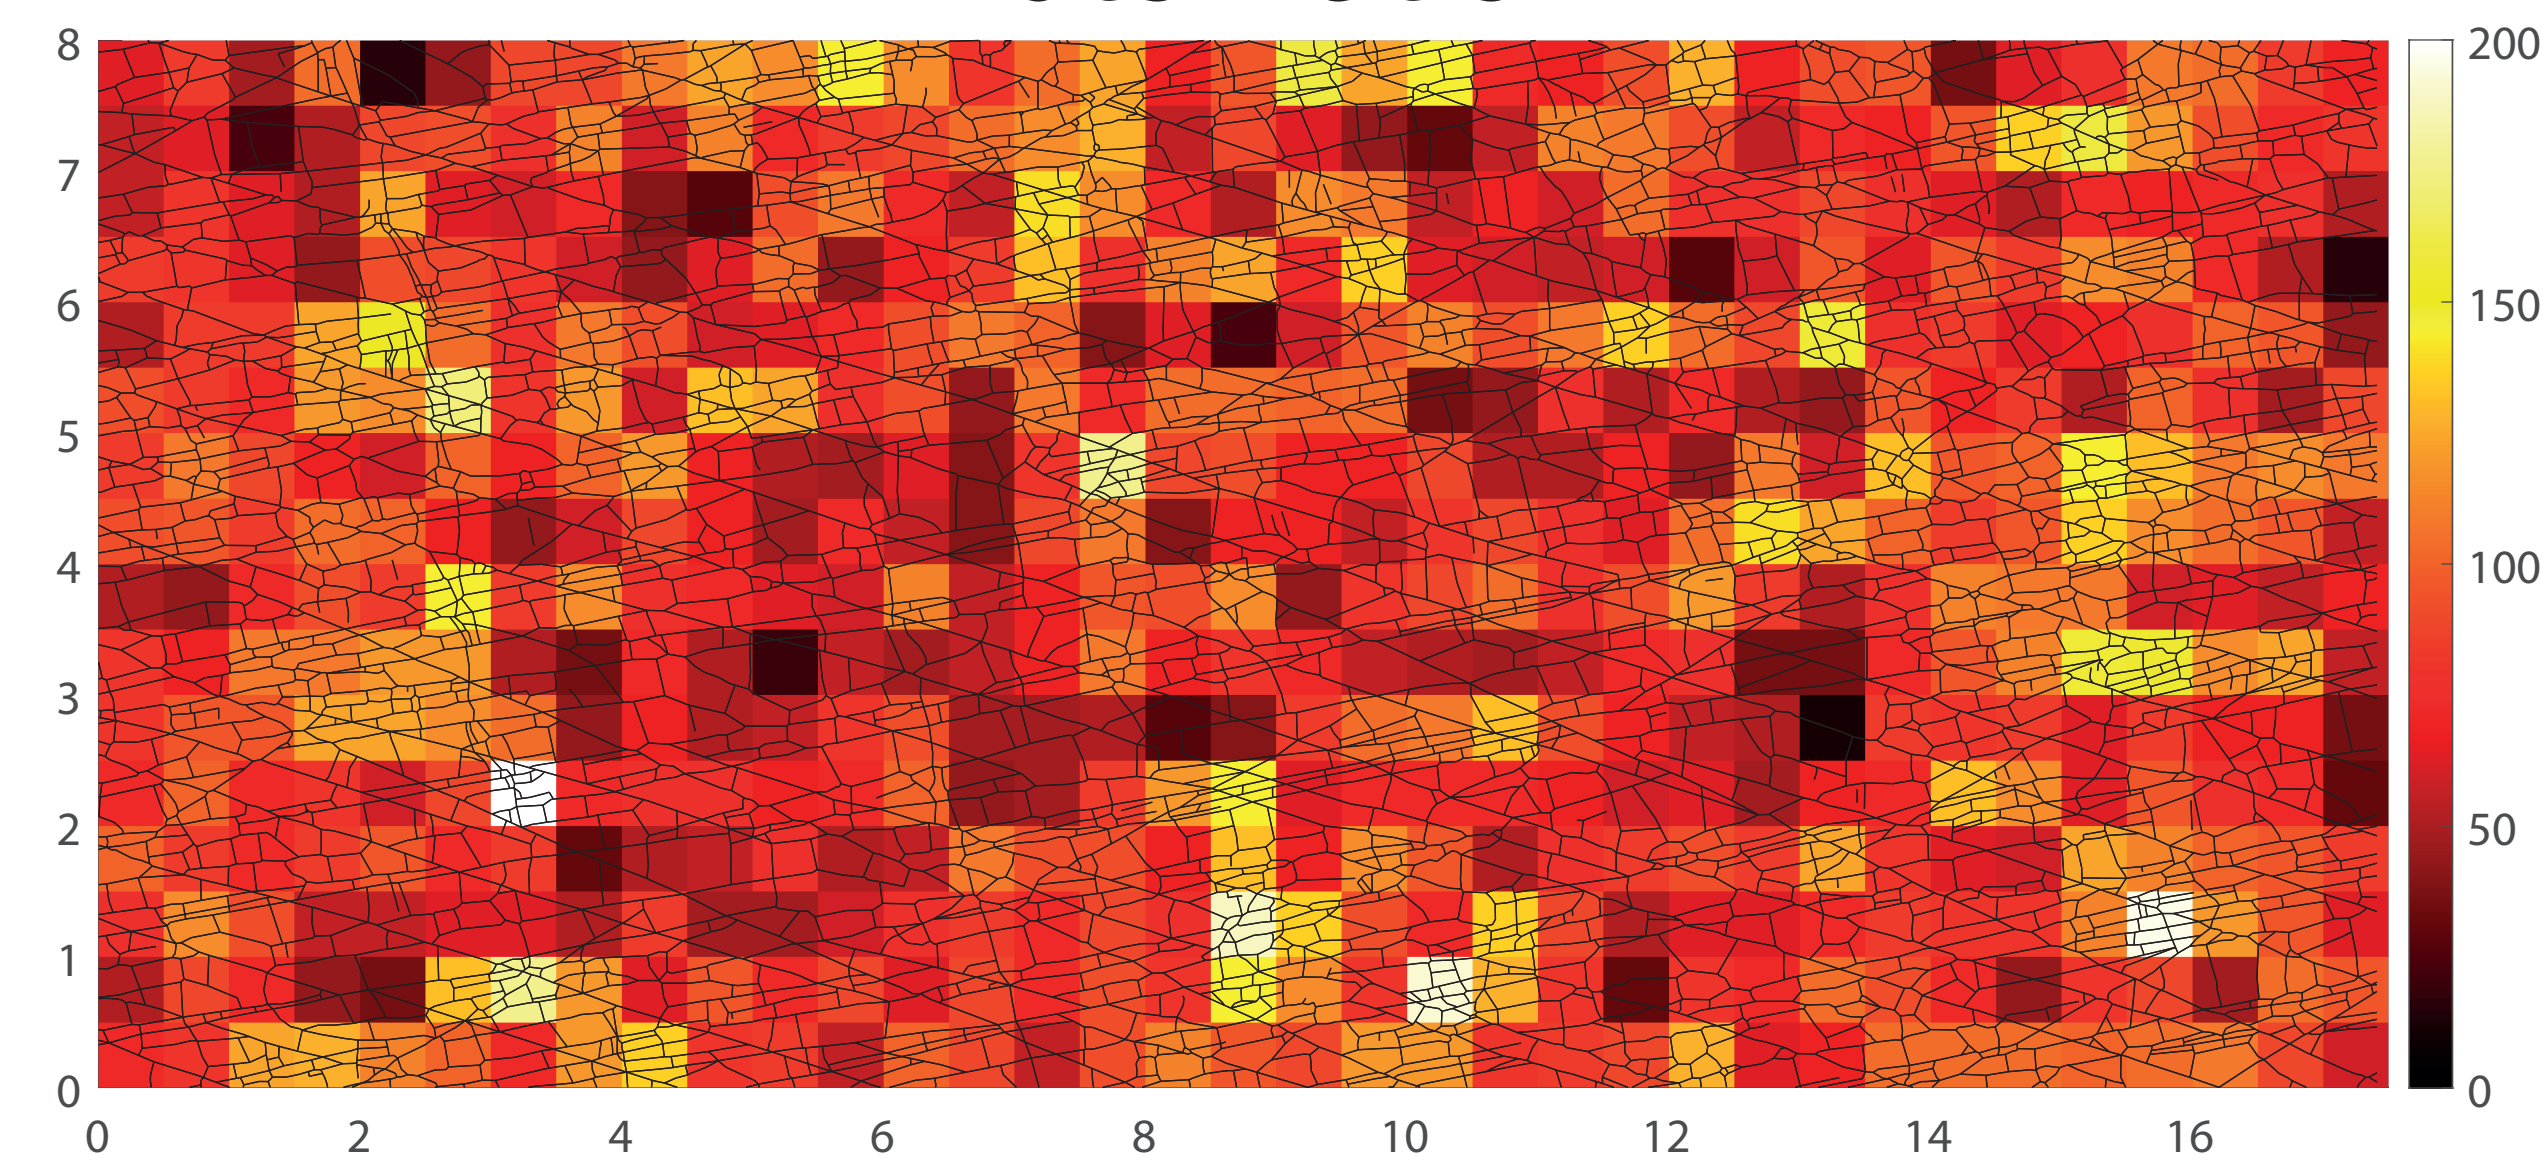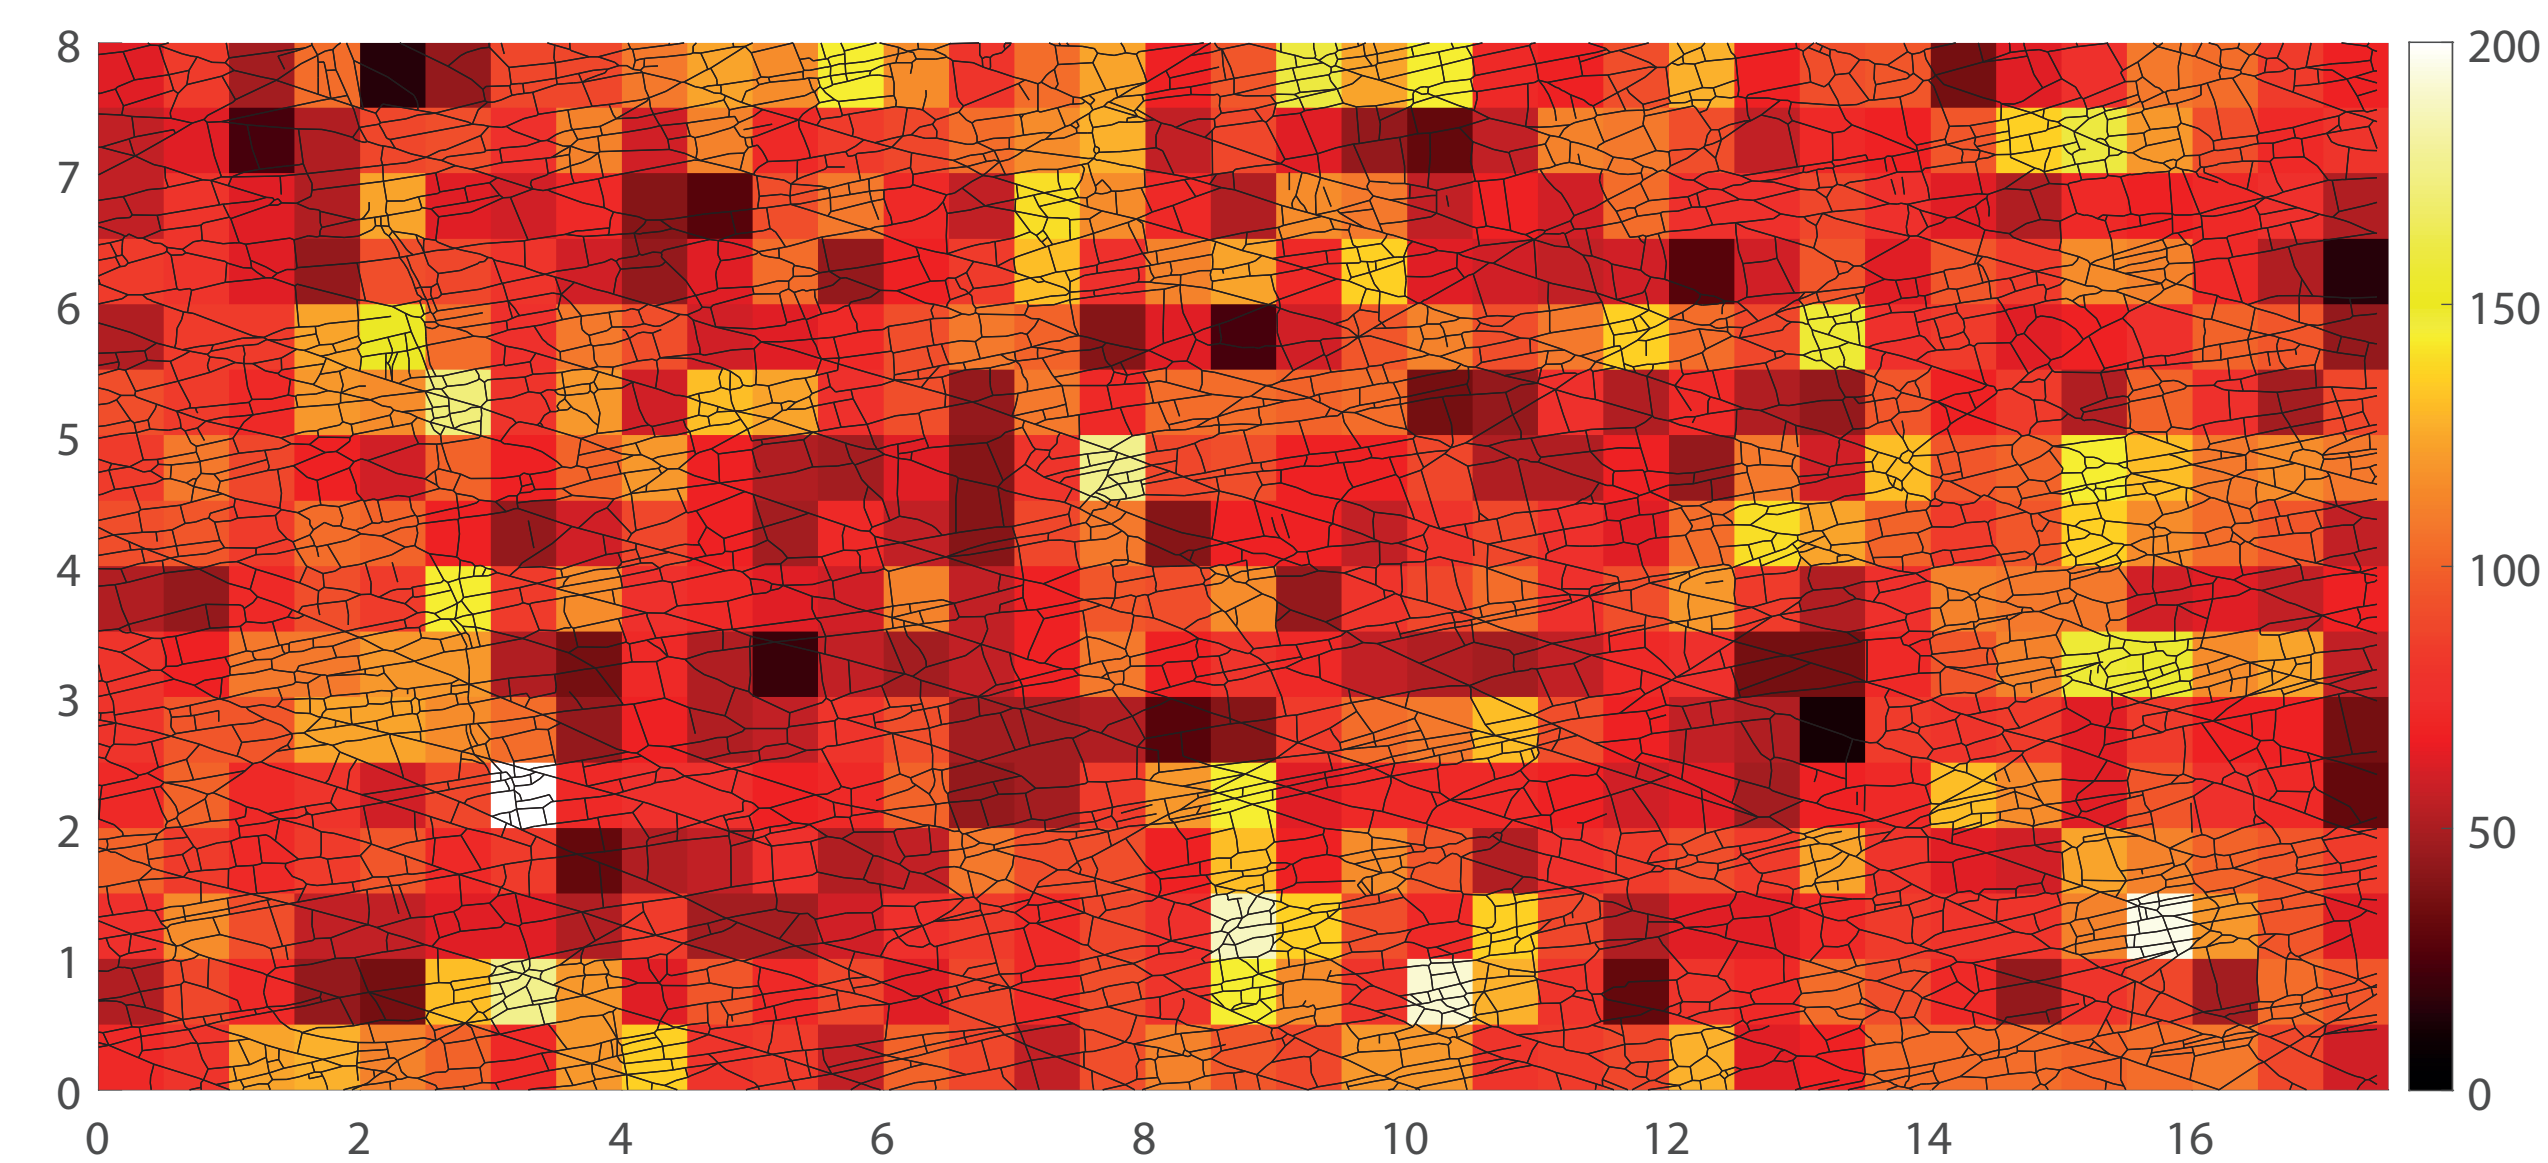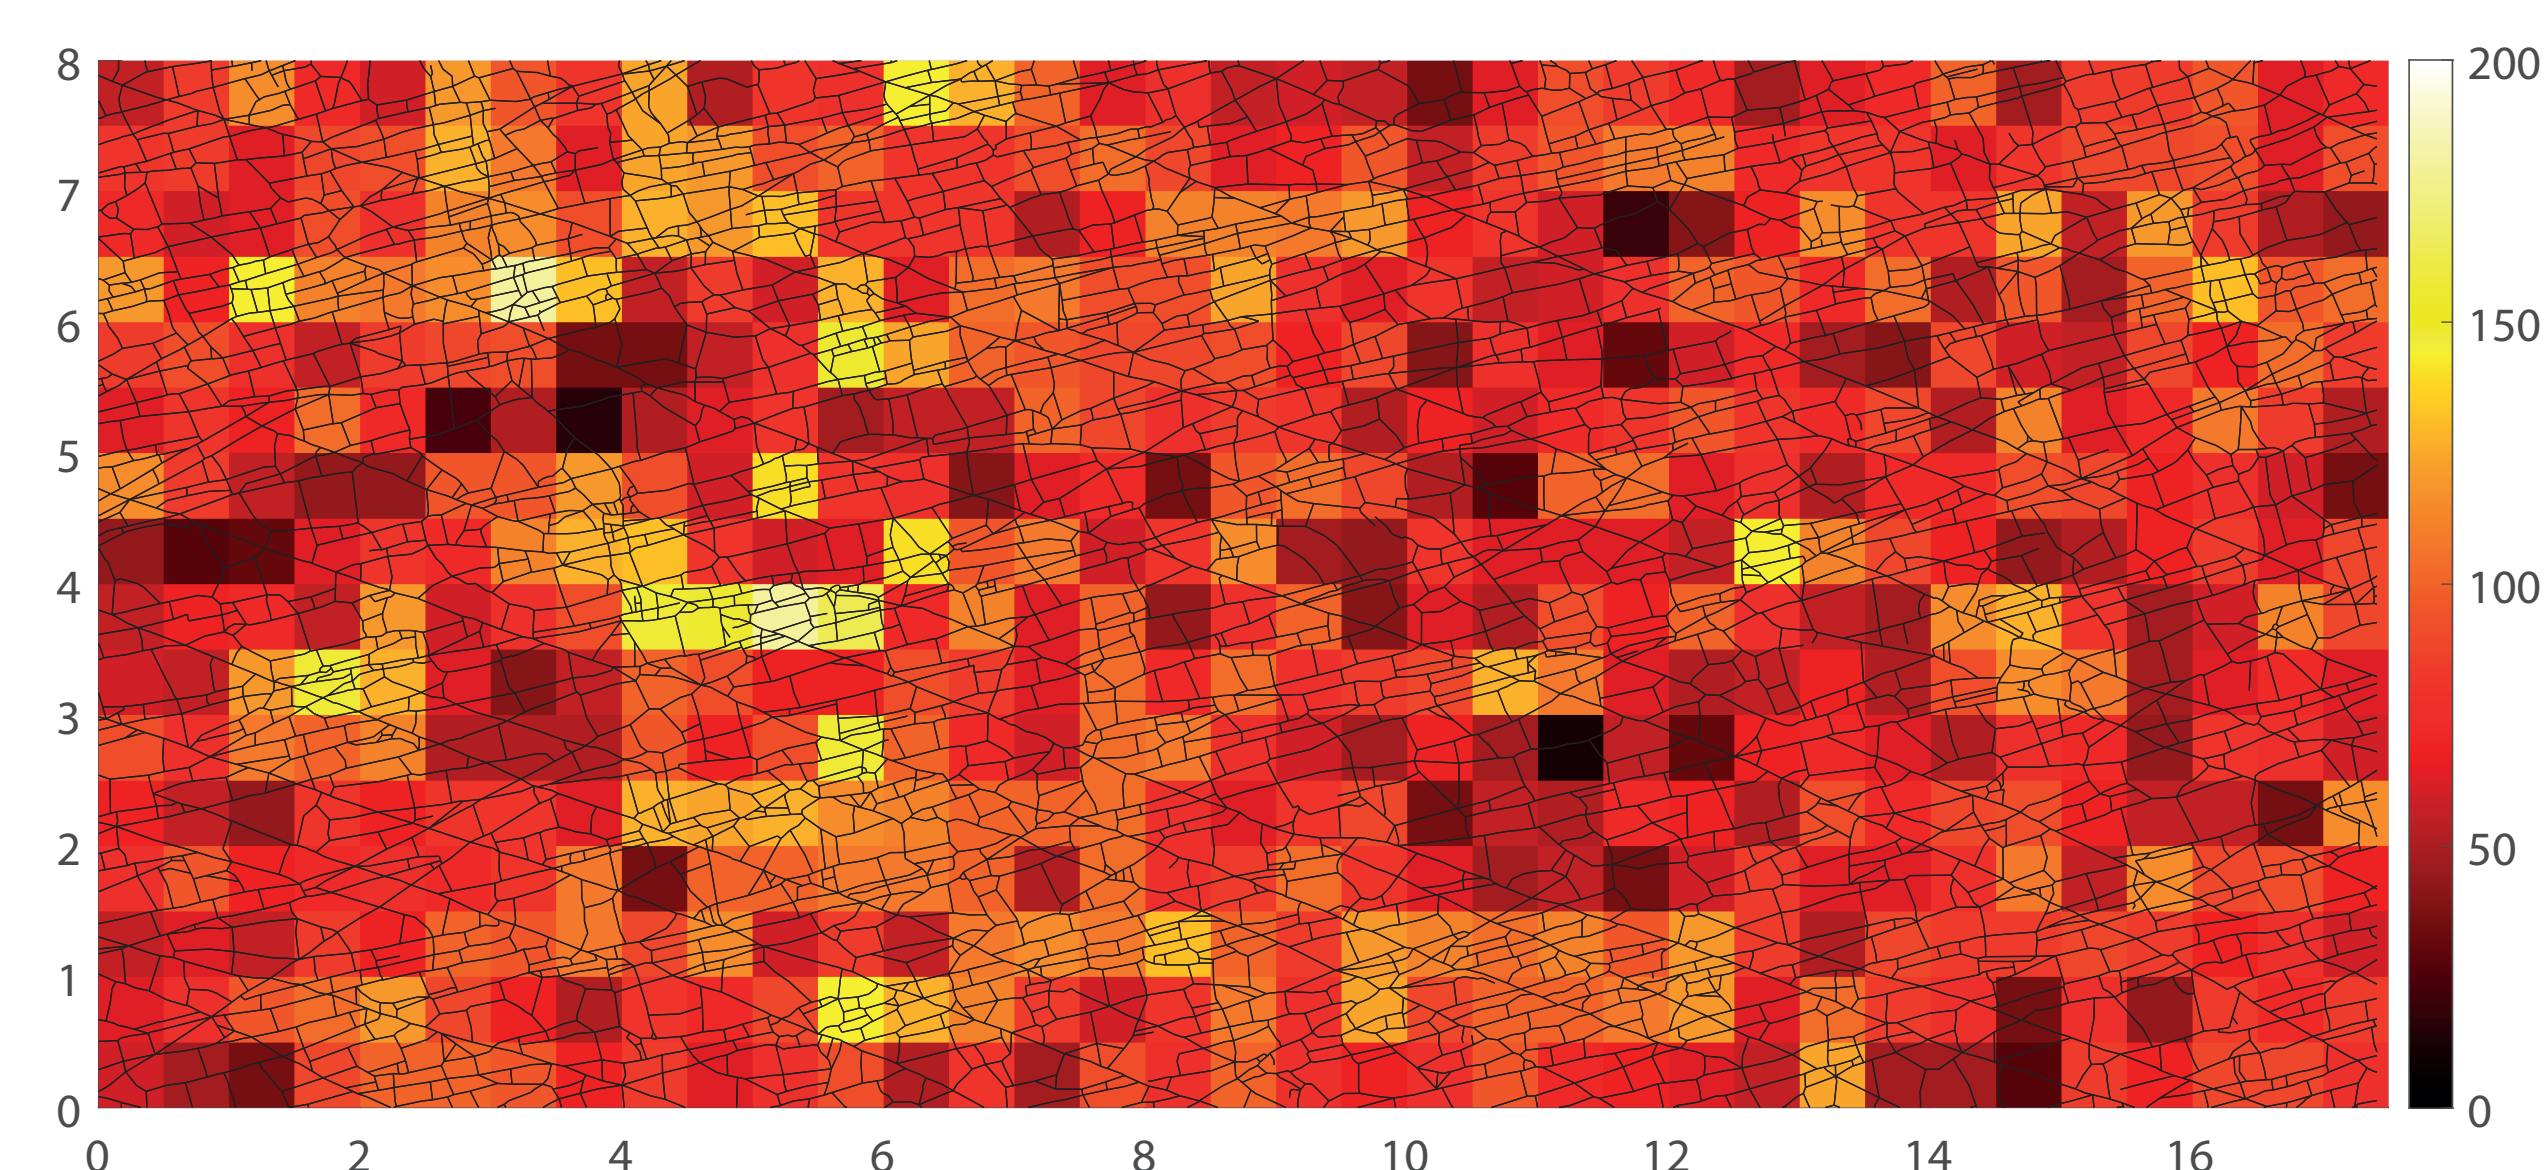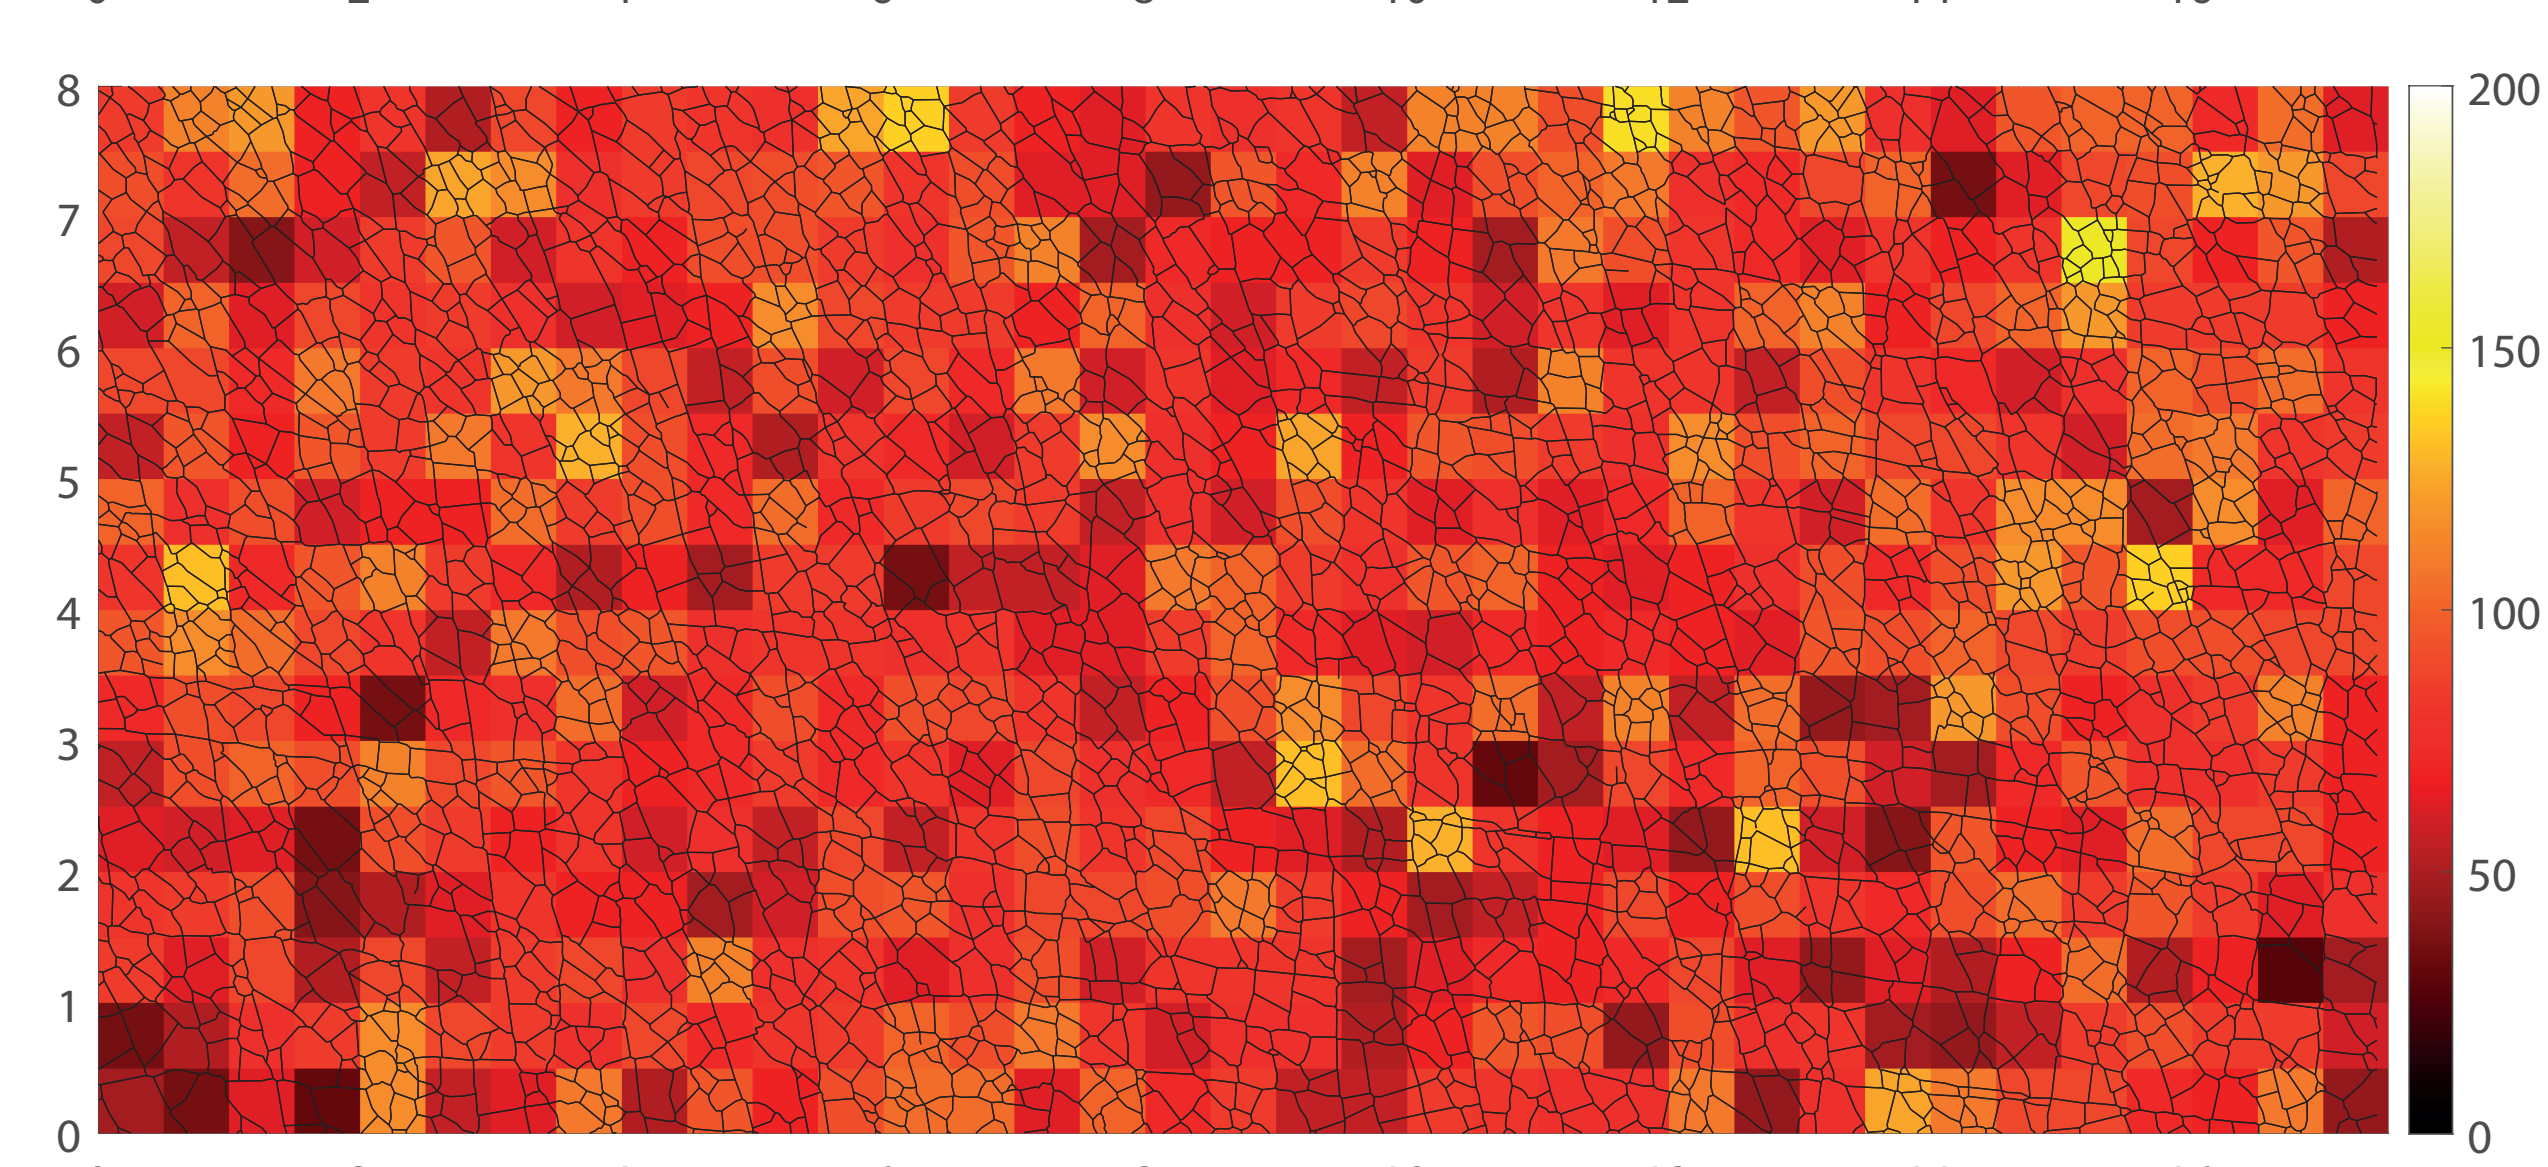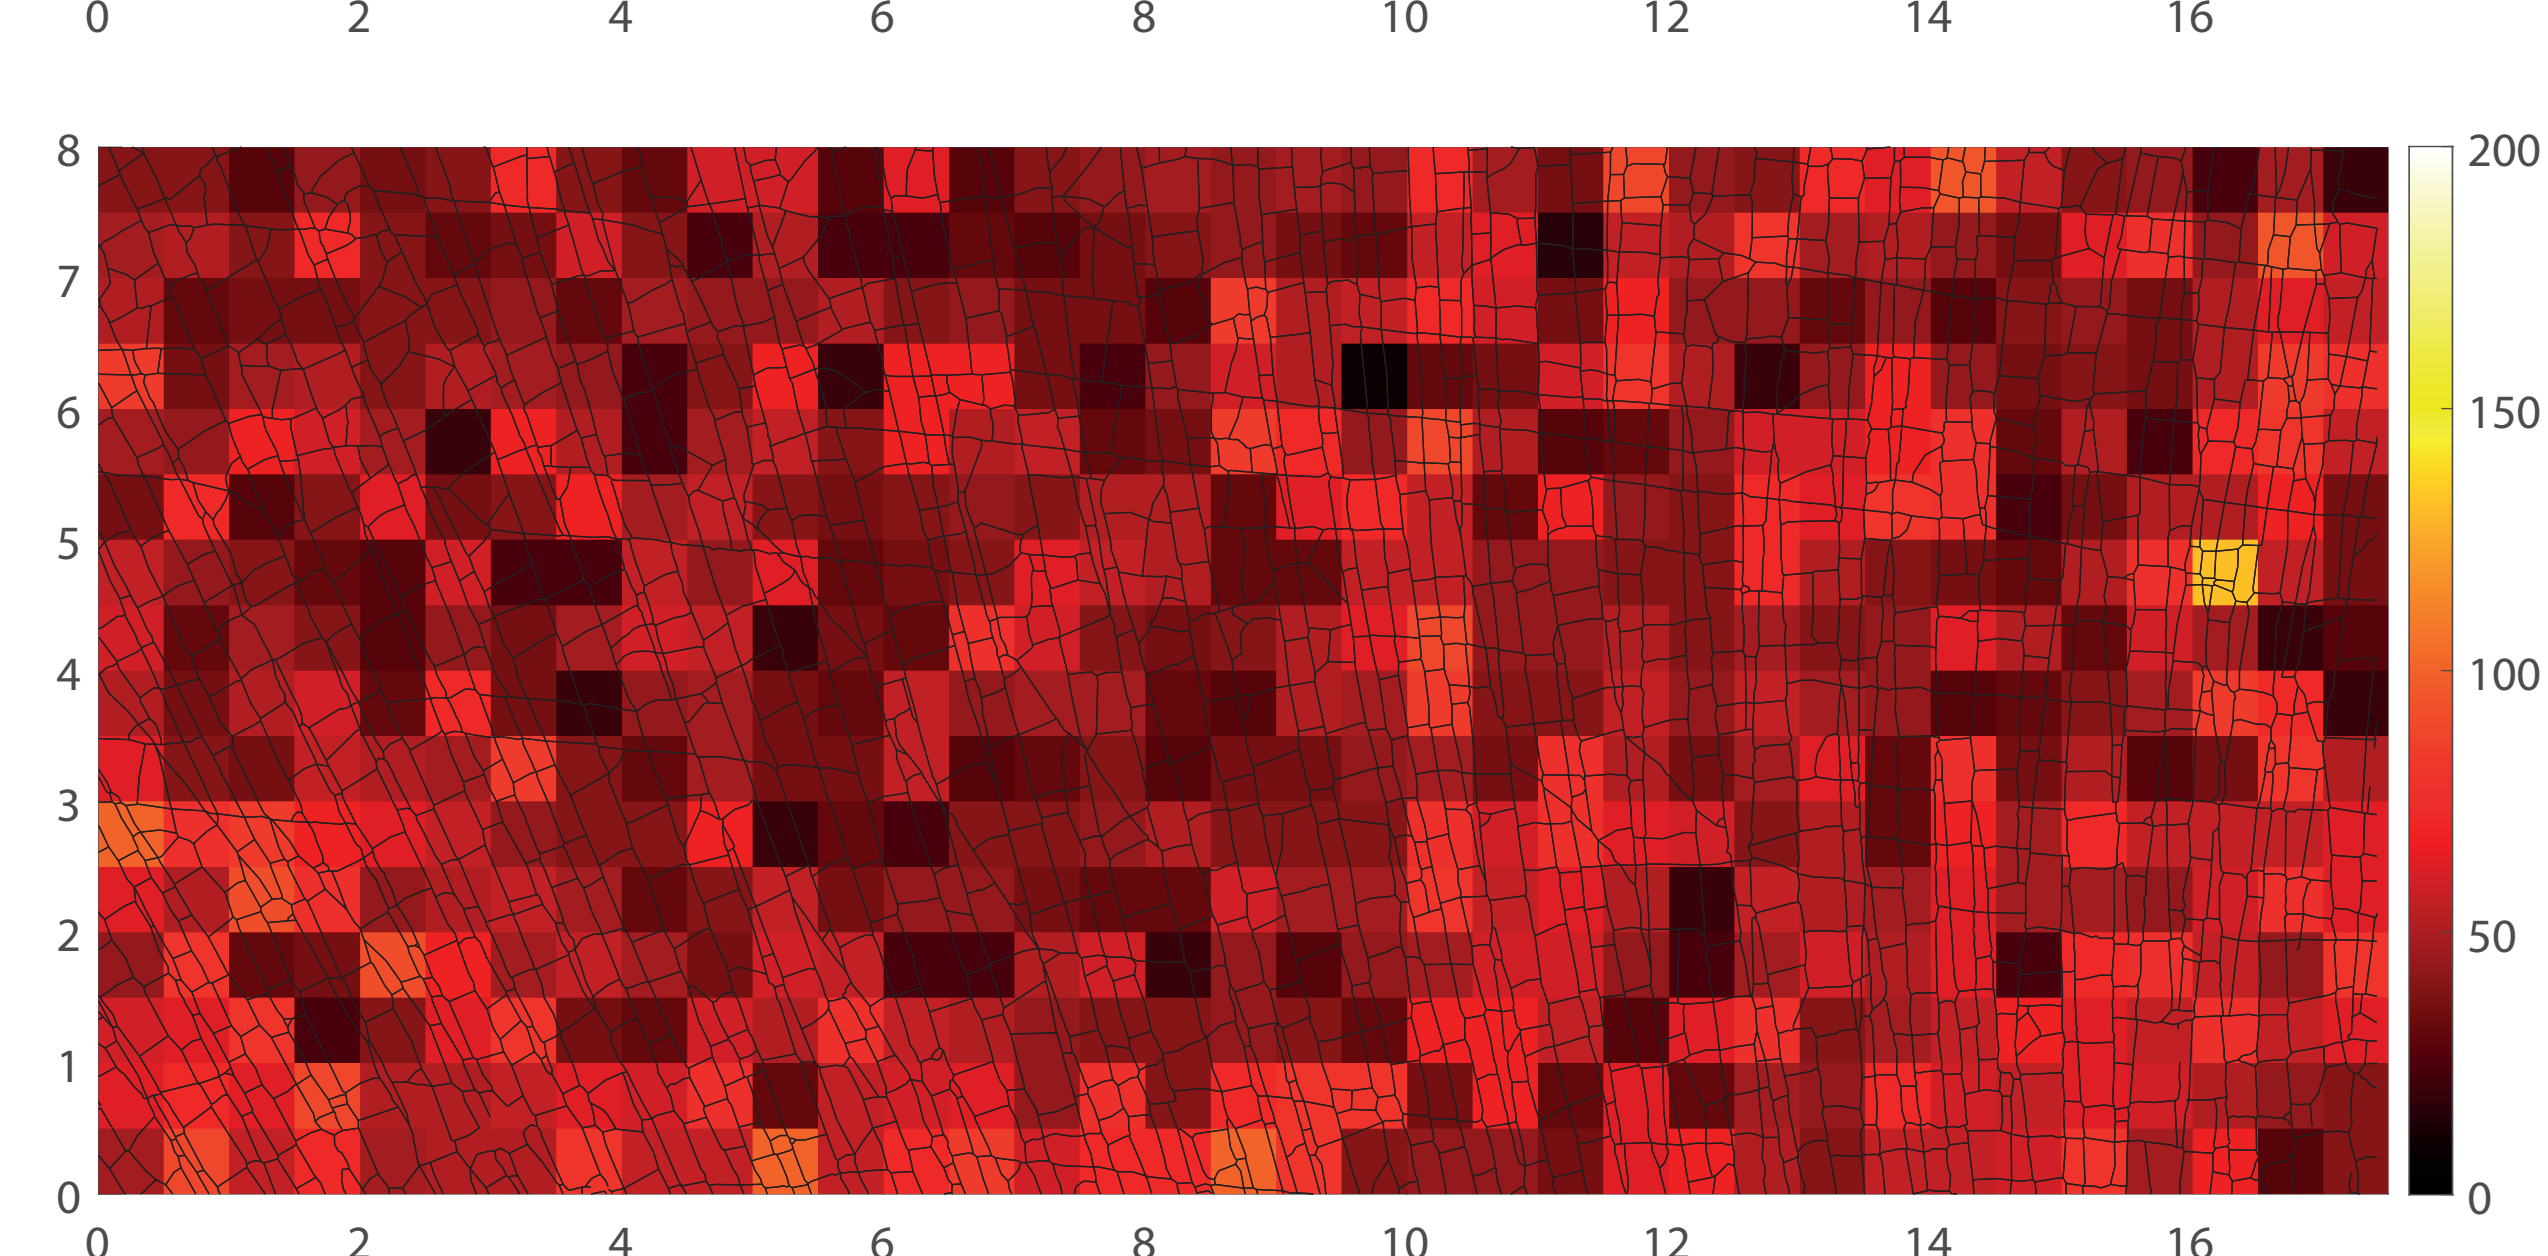

Supplement: Supplementary file 1 [file se-11-1773-2020-supplement.zip]

# P20 absolute difference

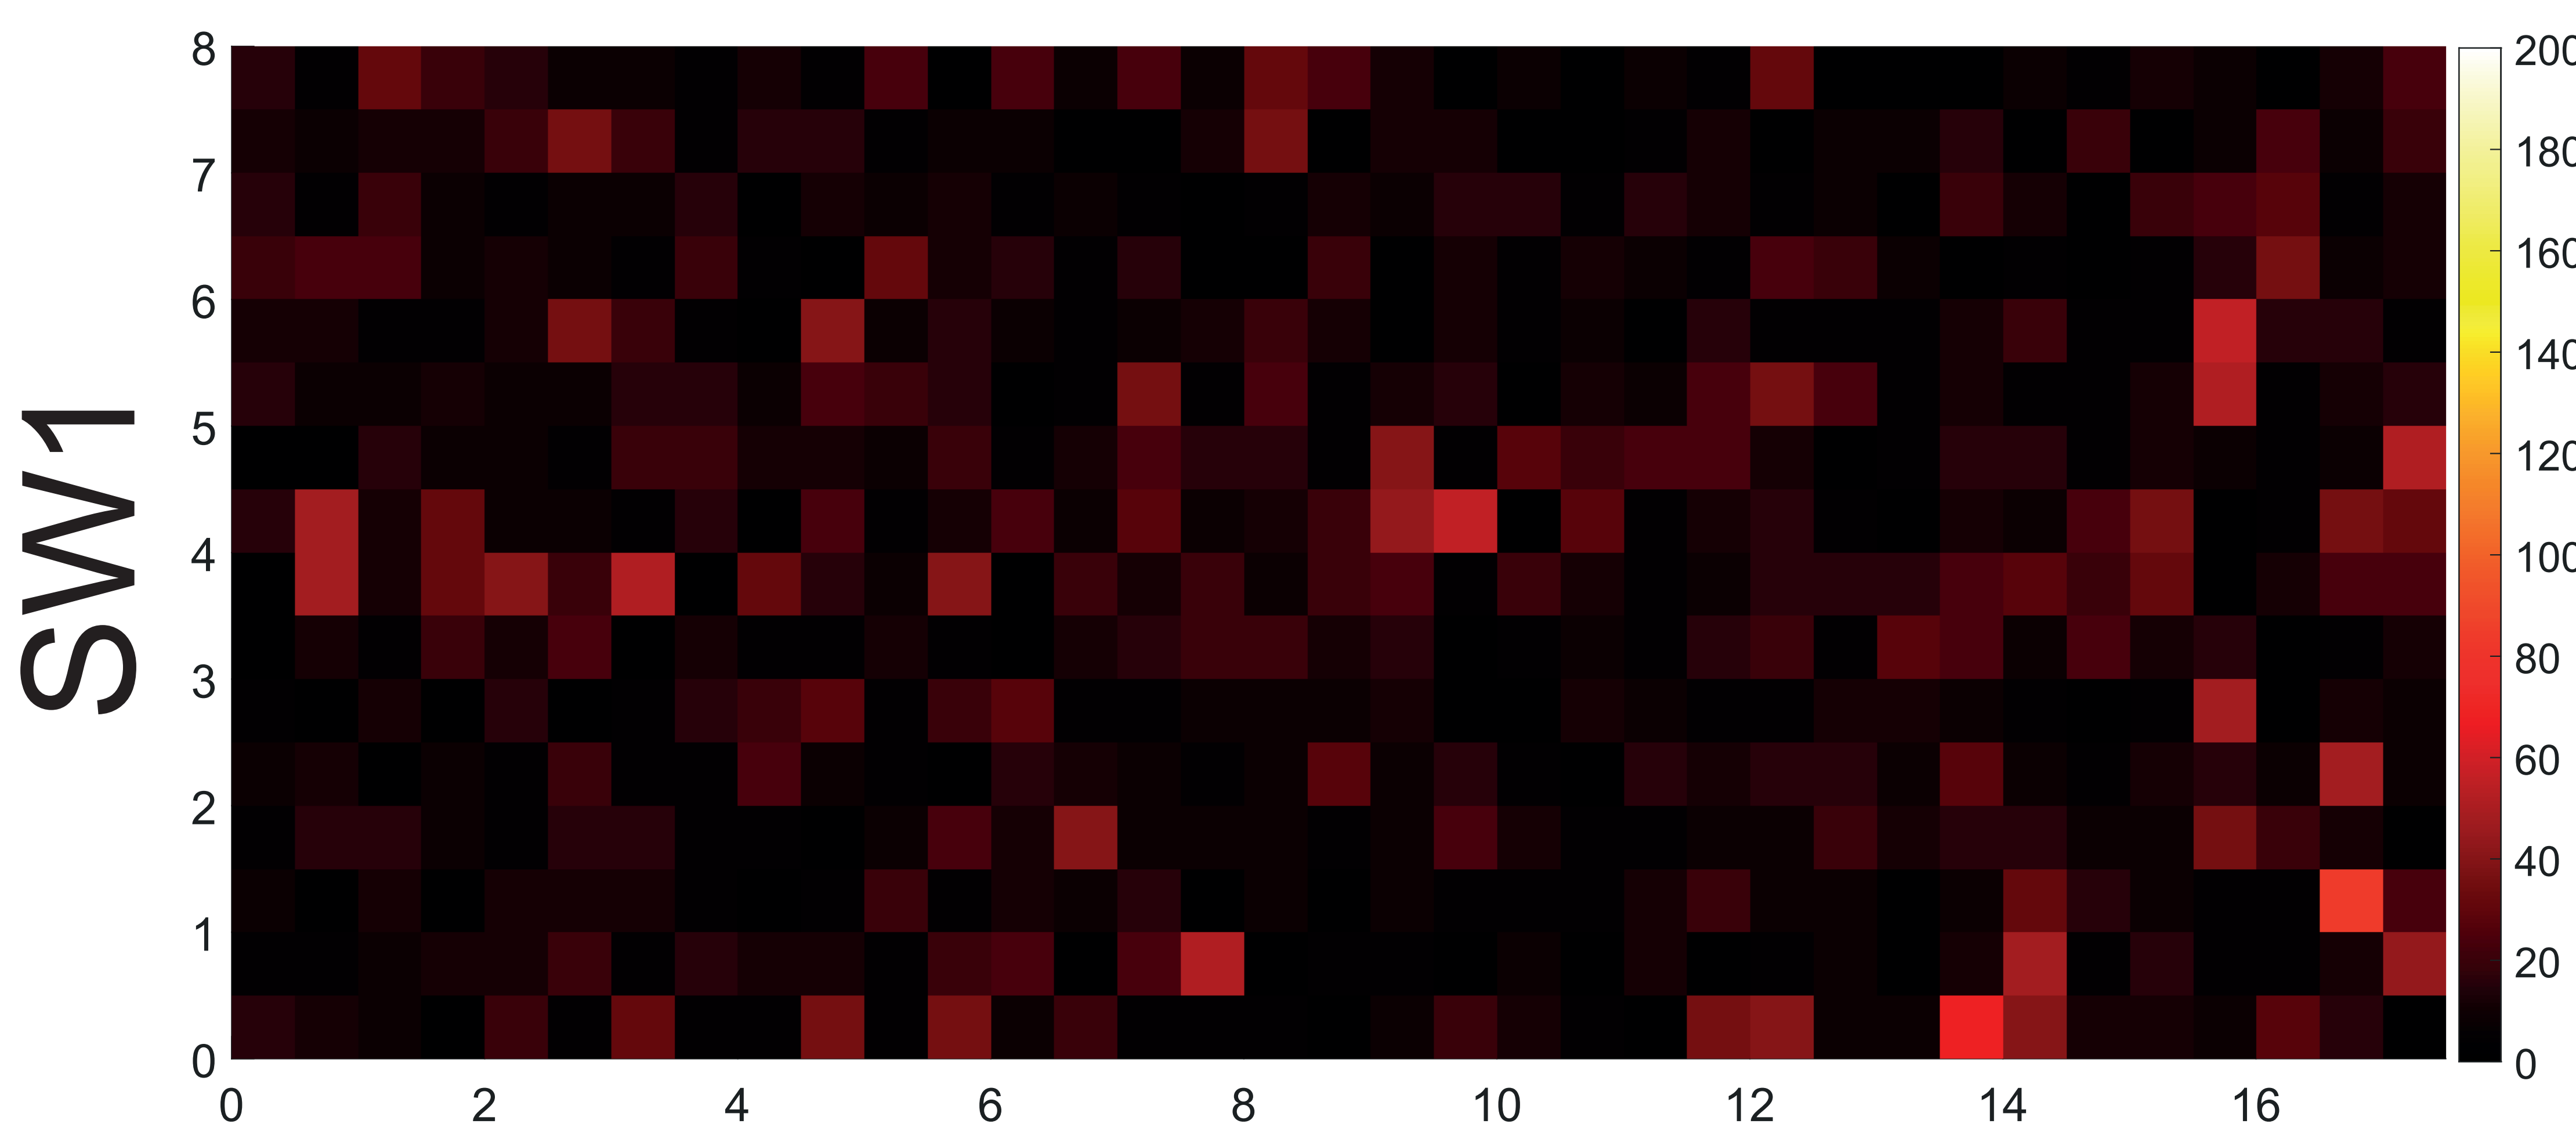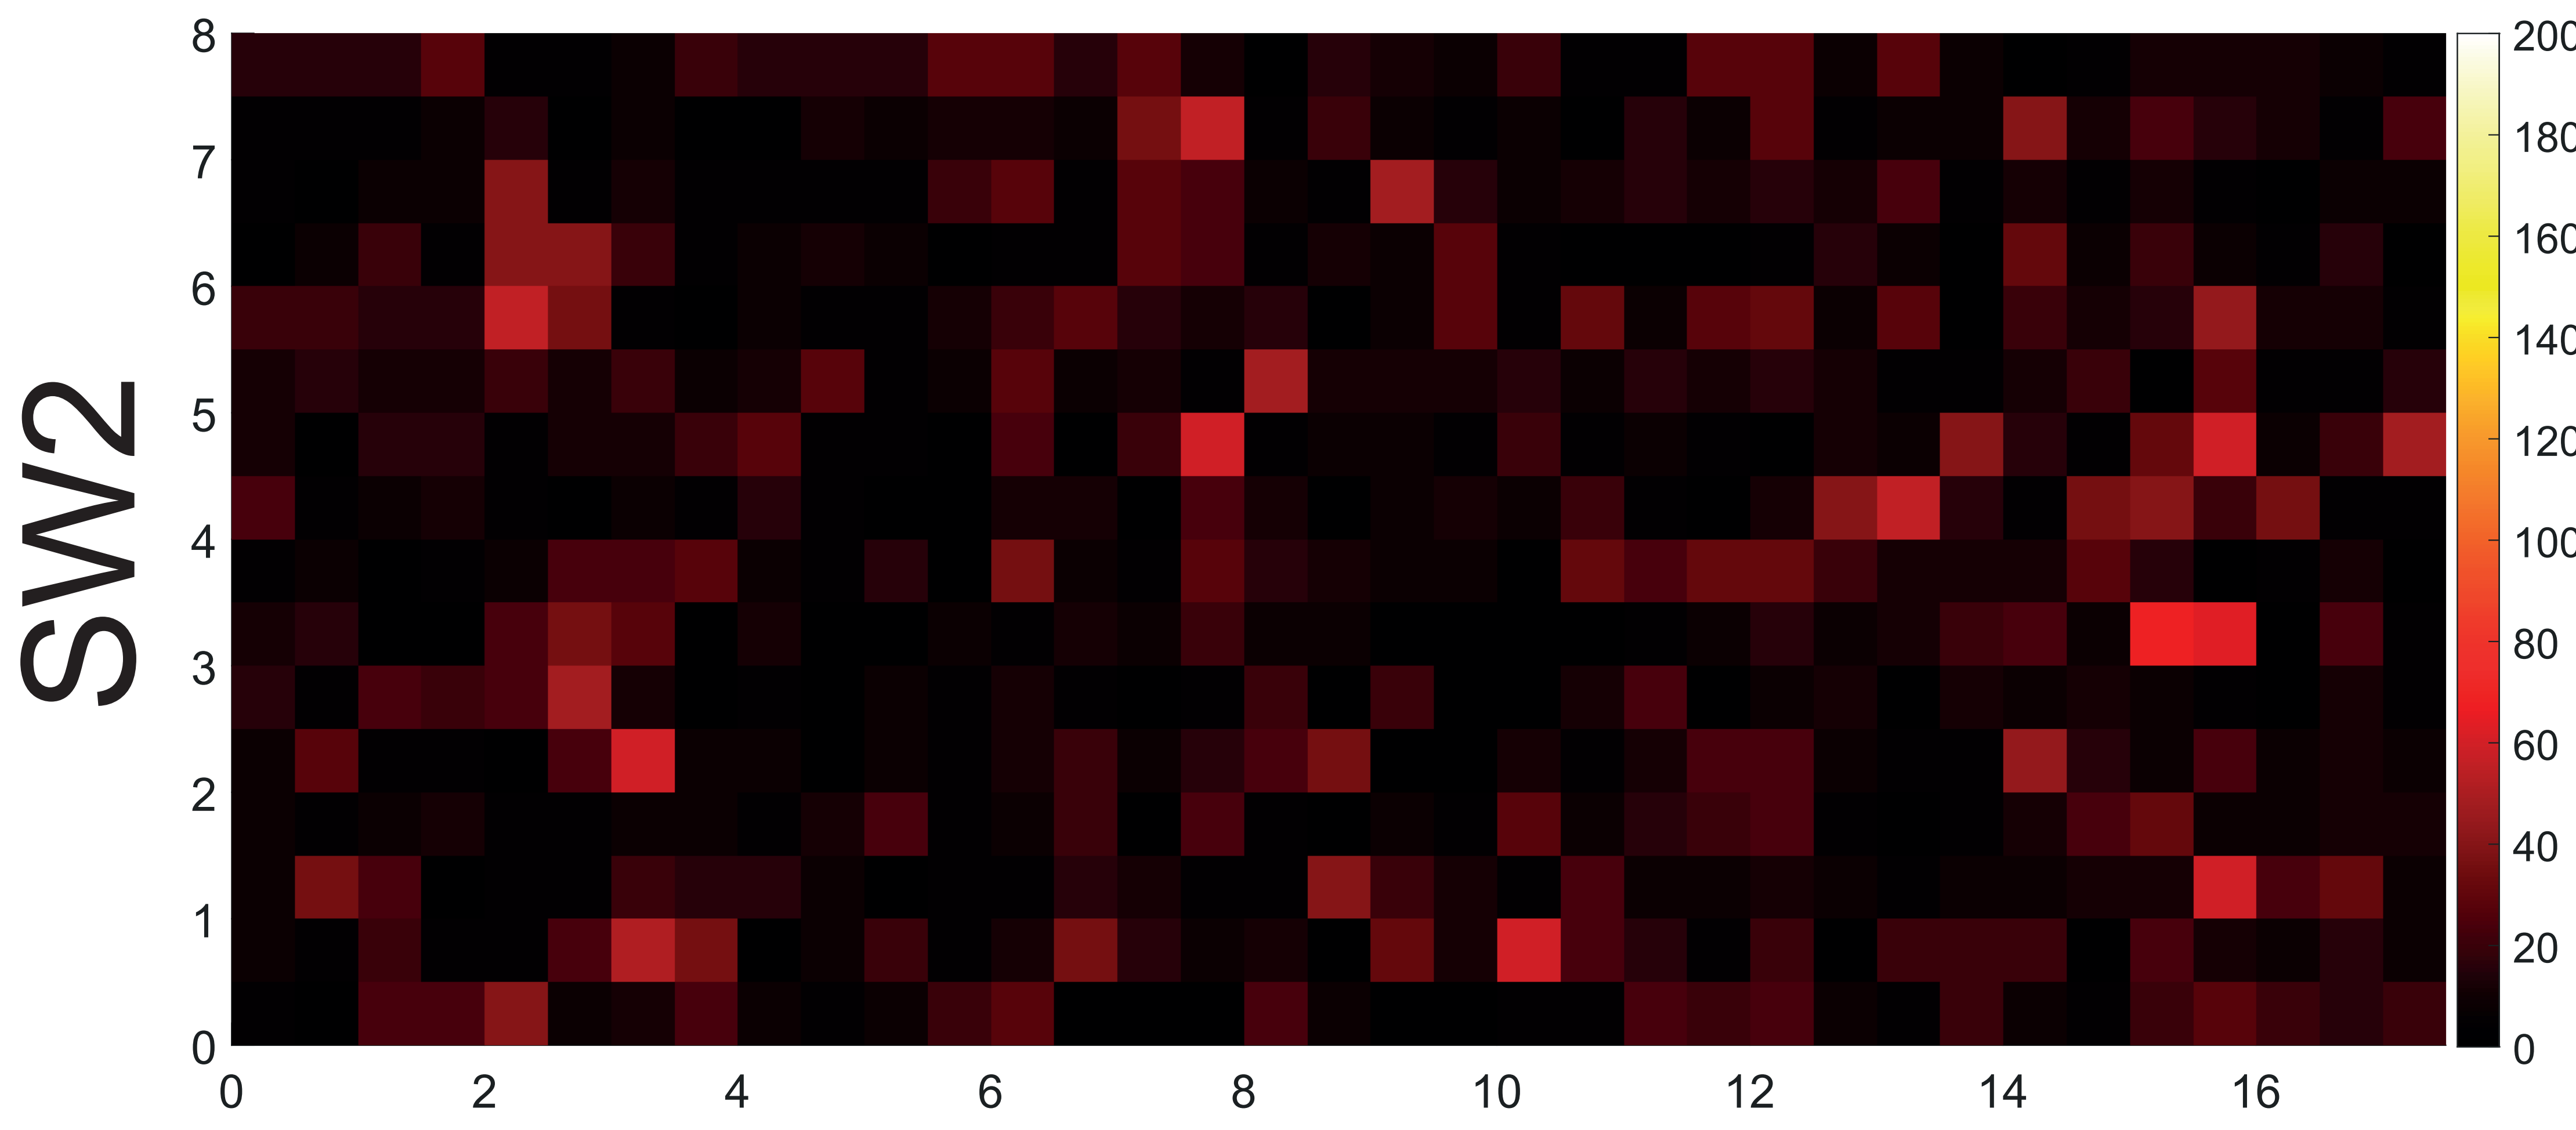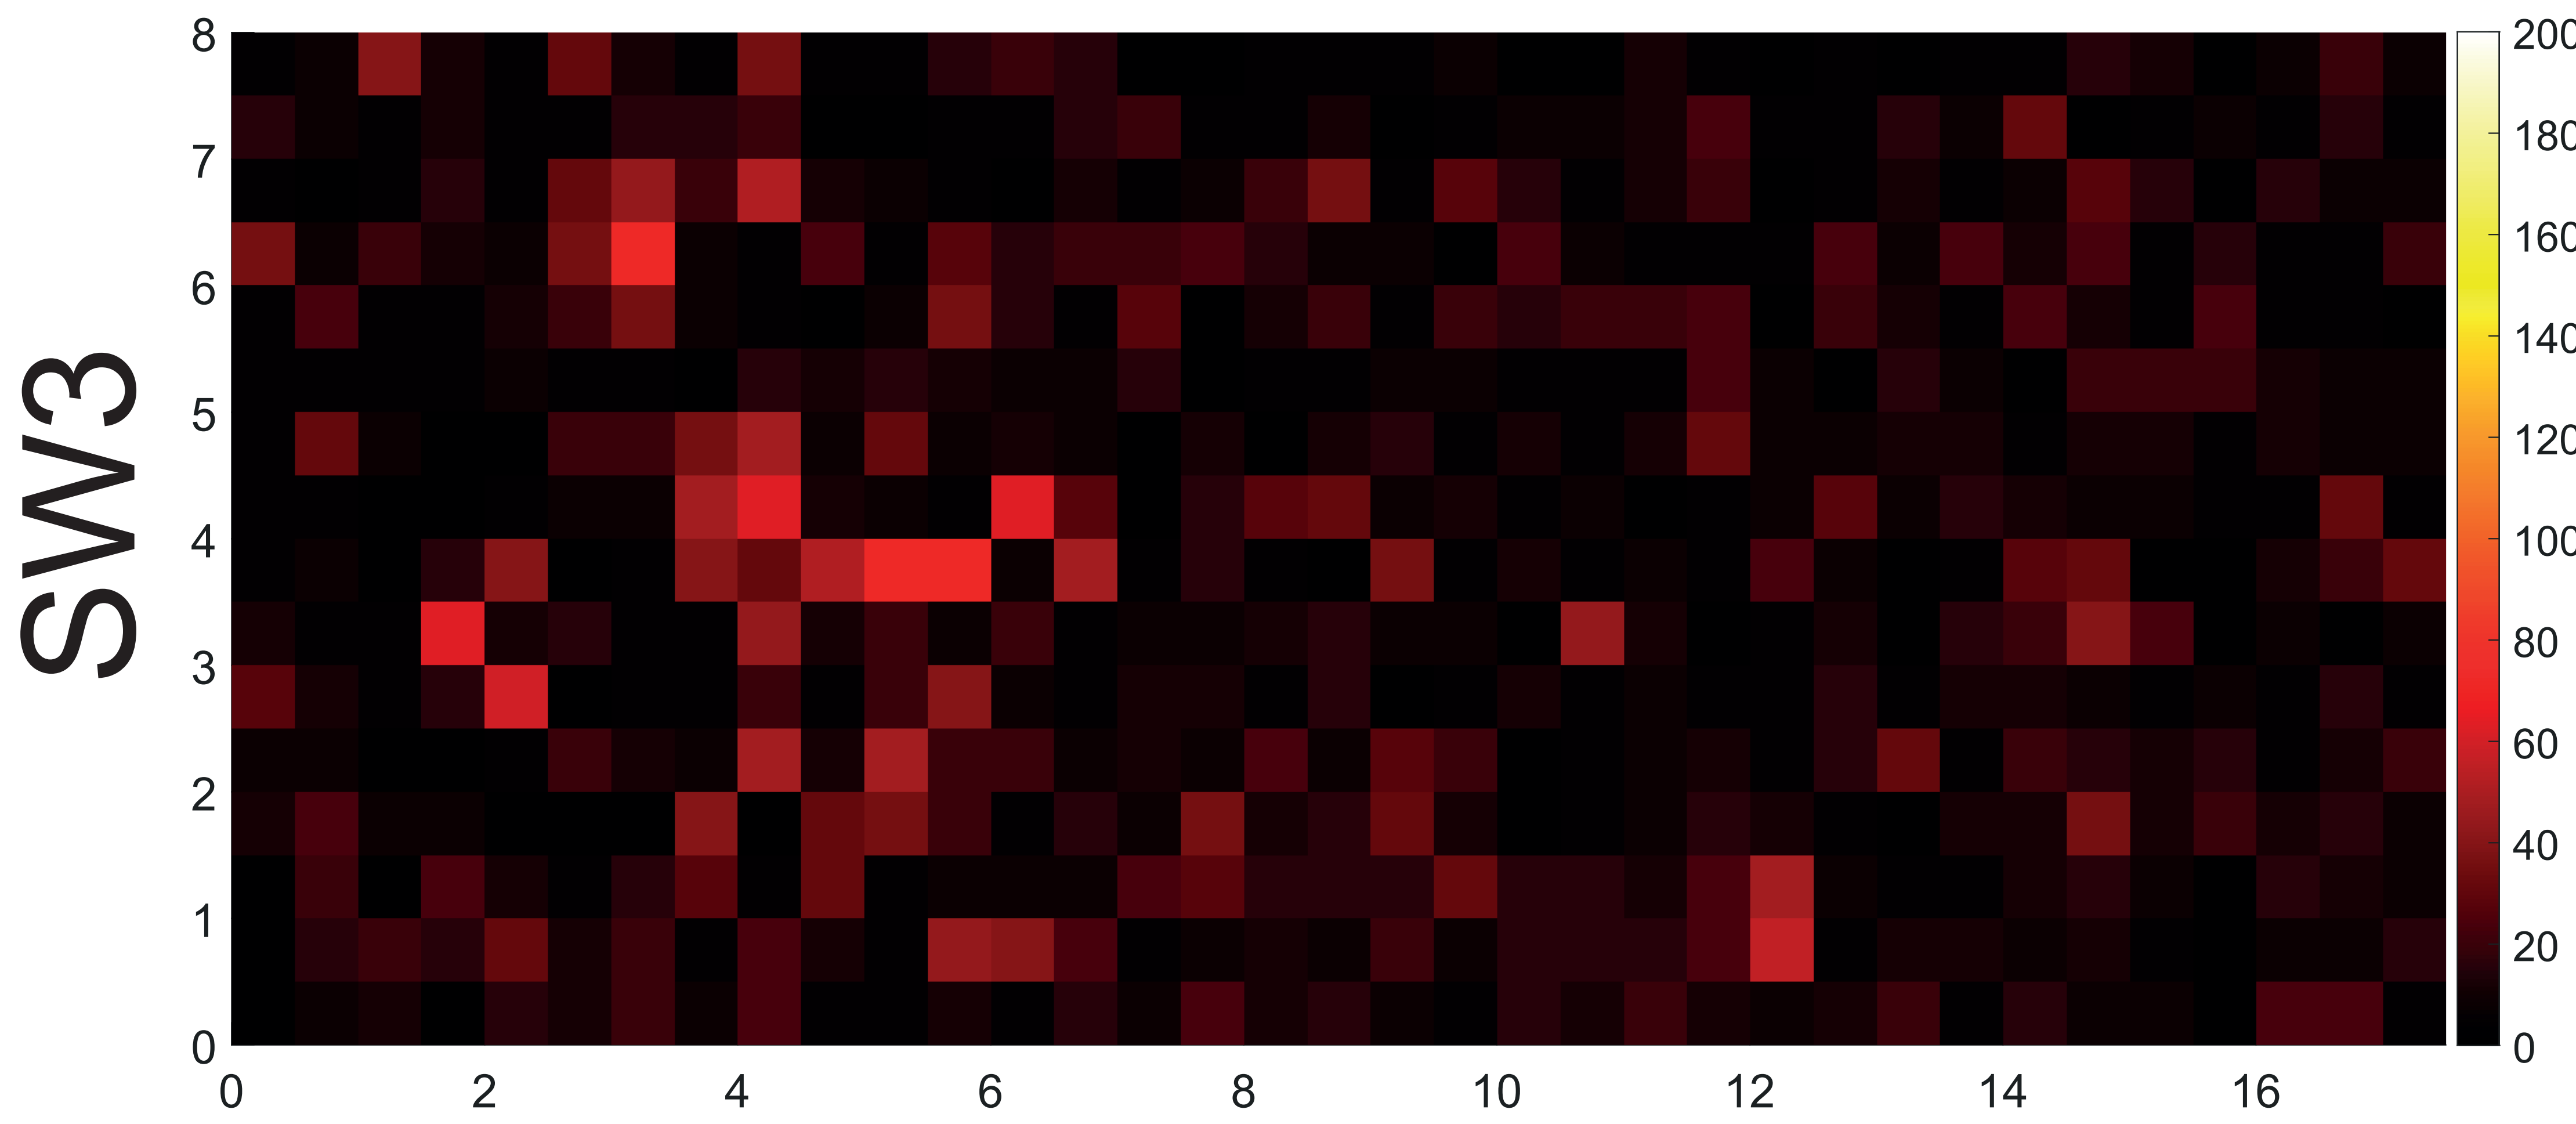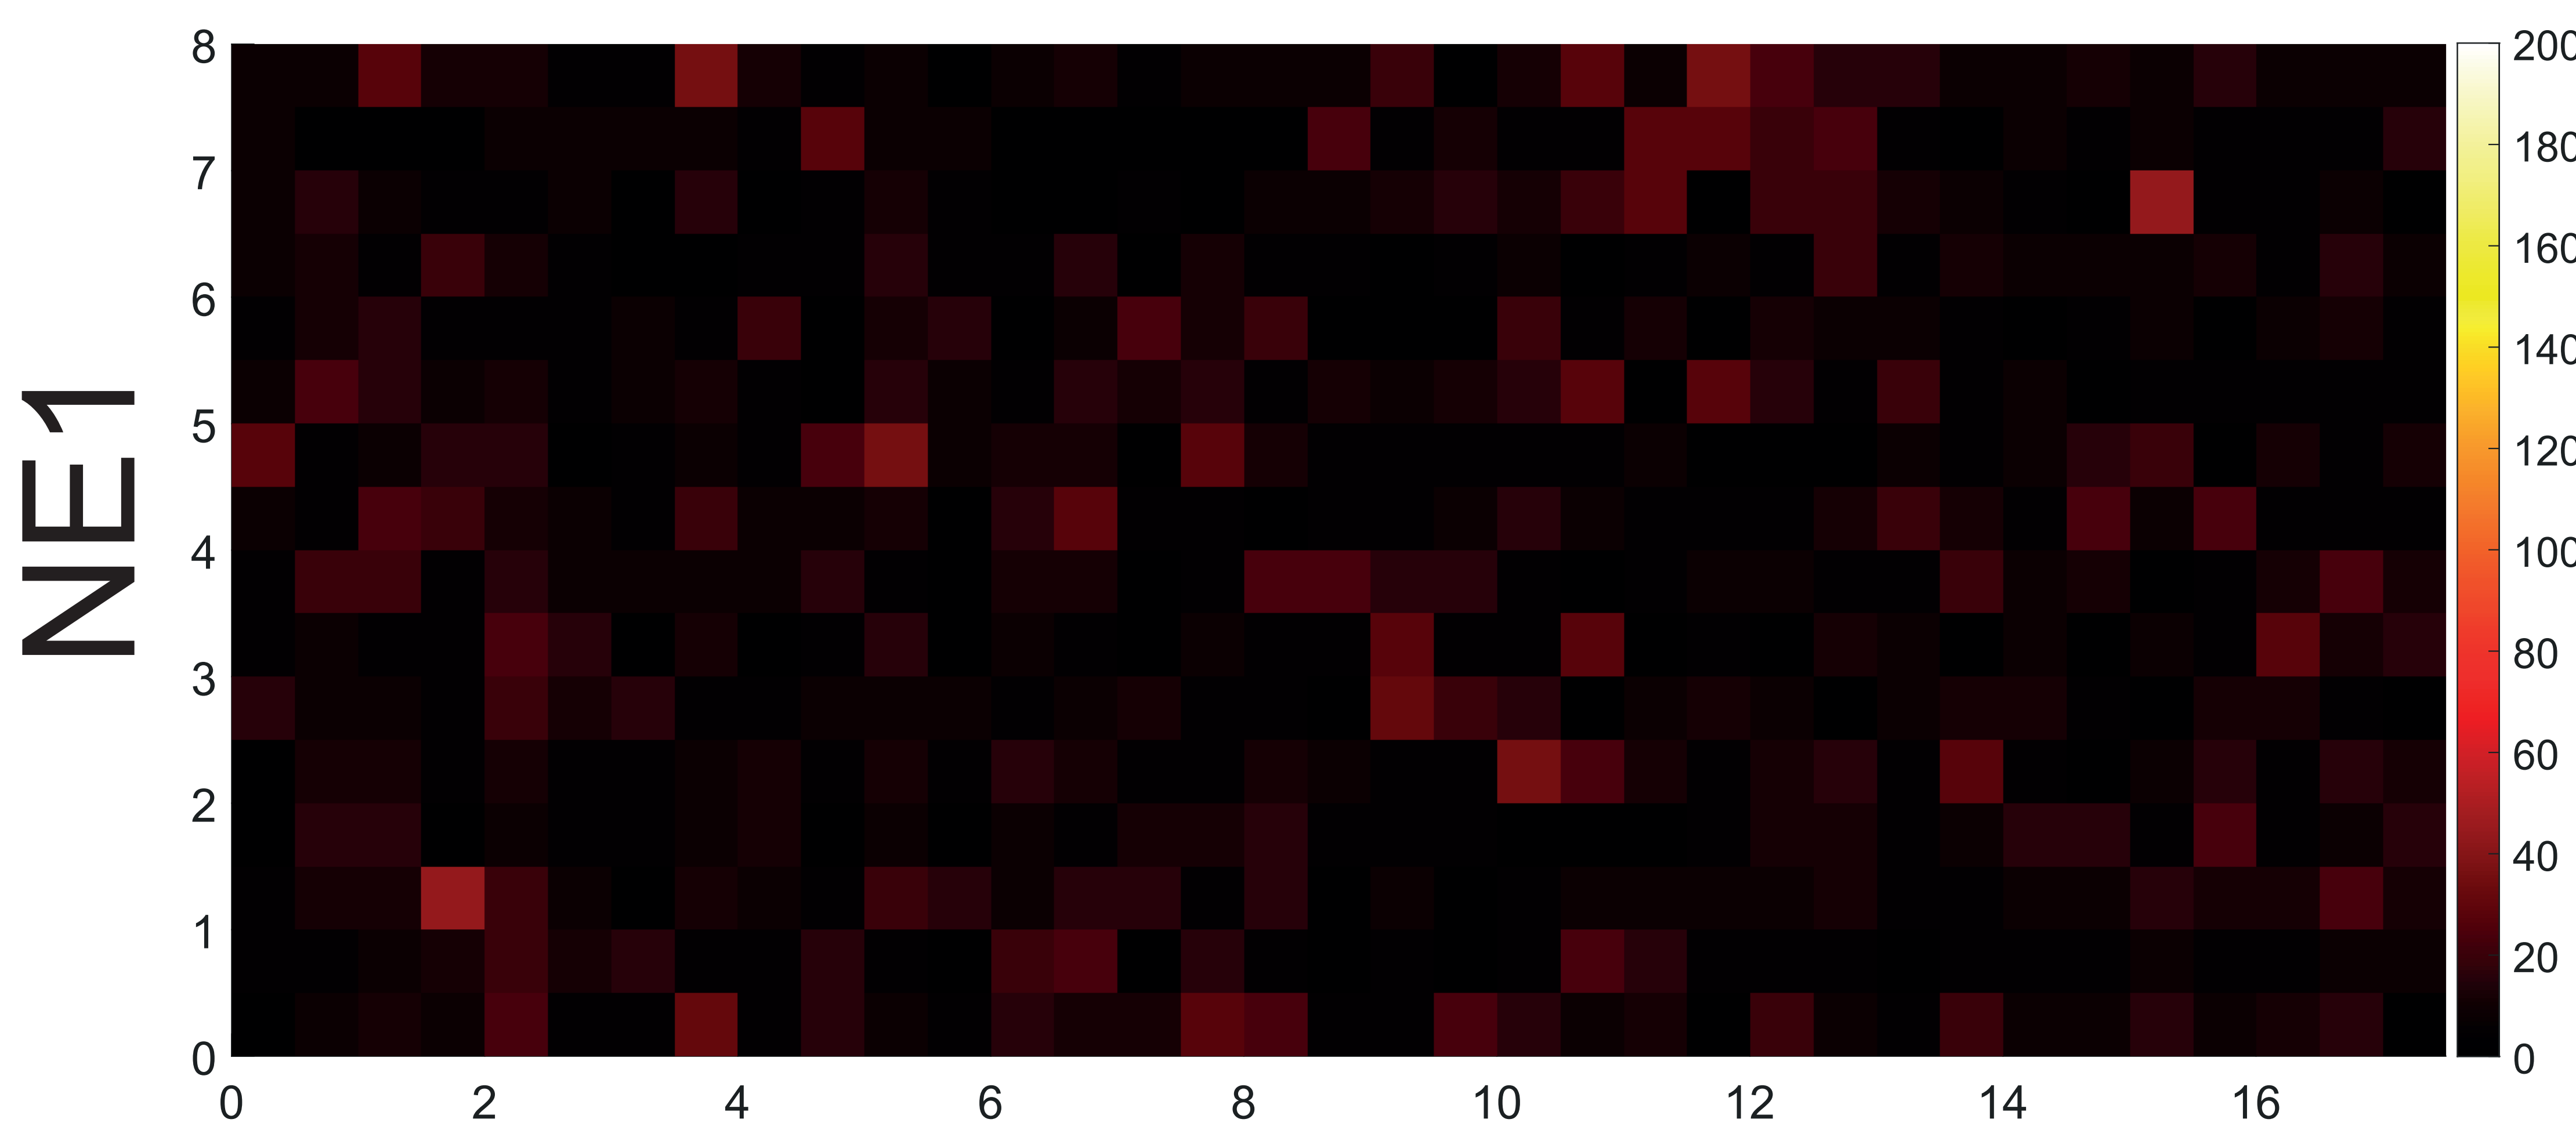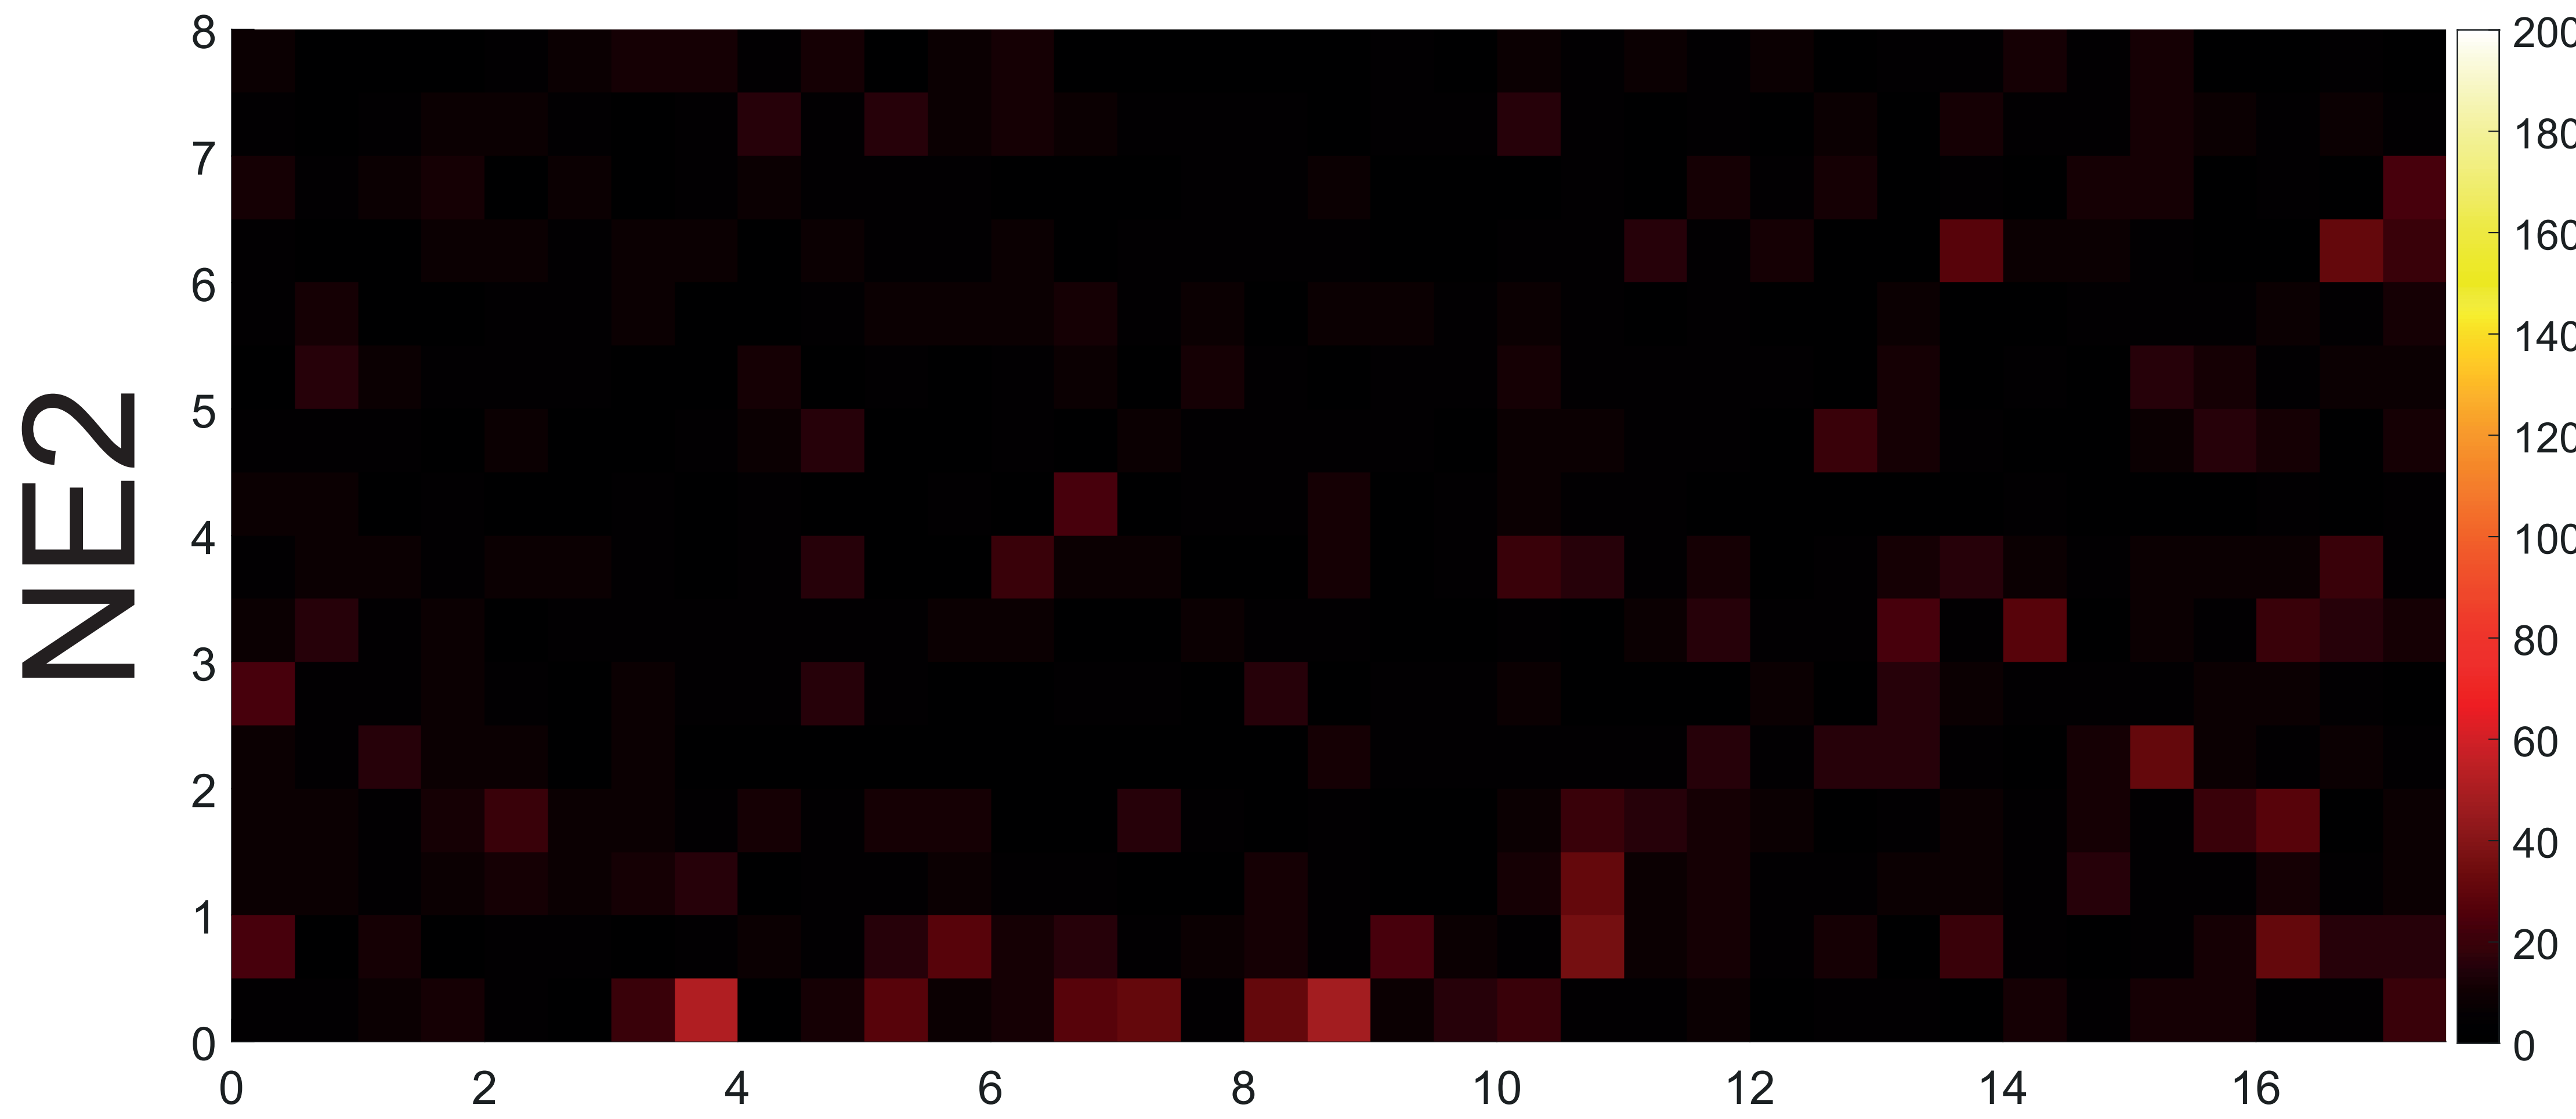

# P20 difference

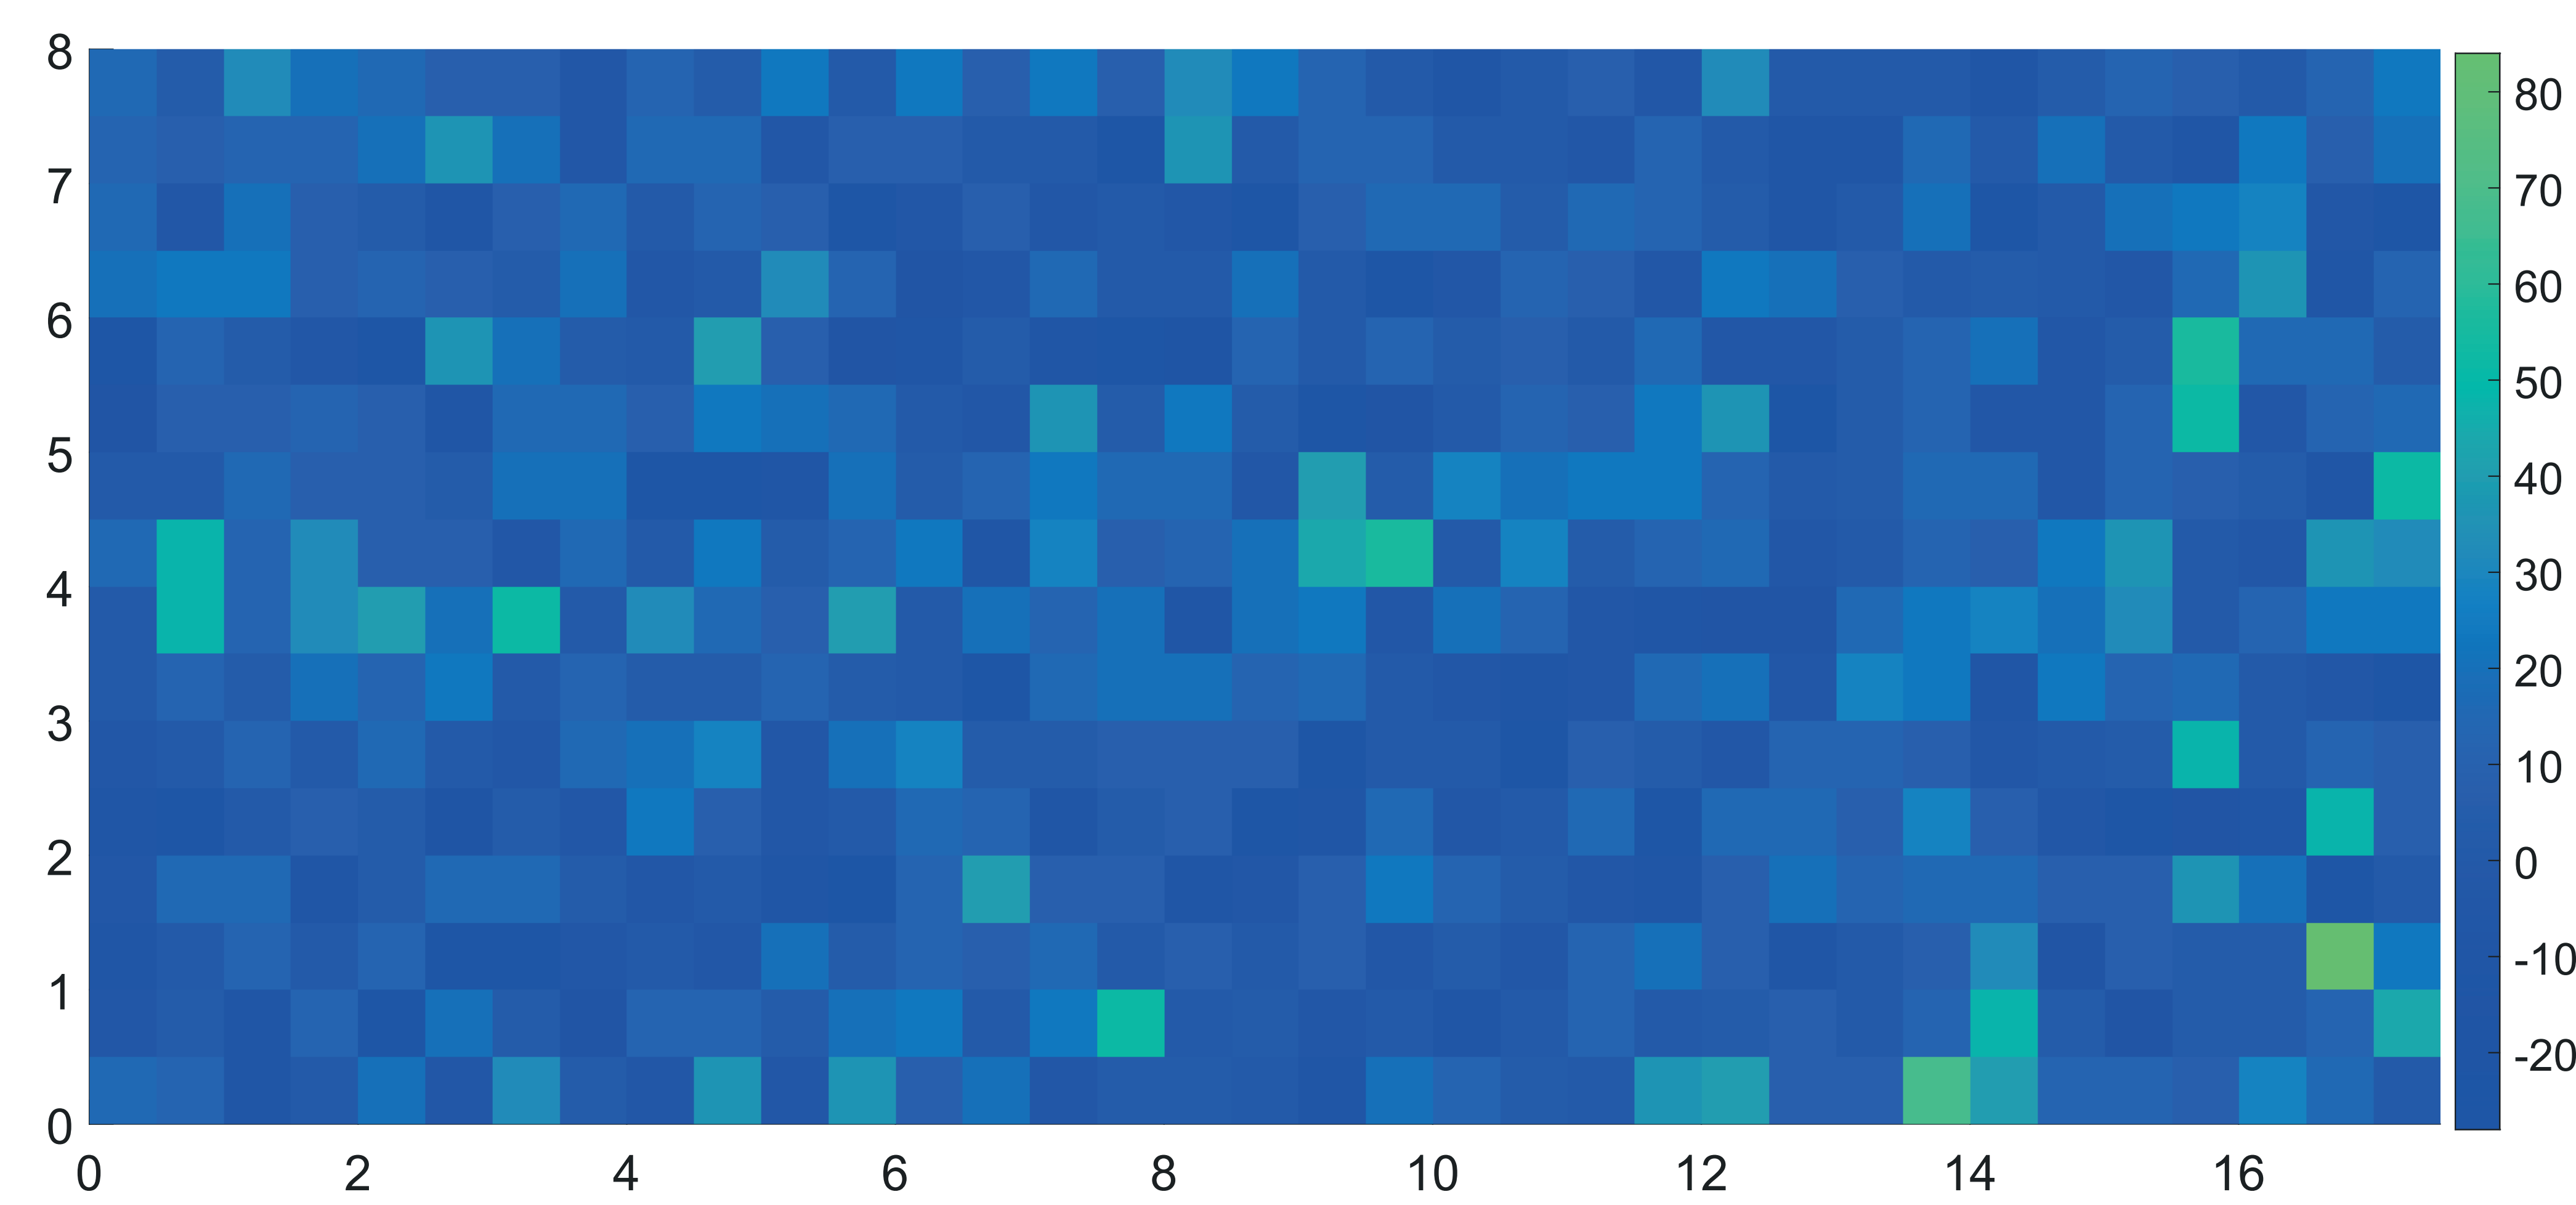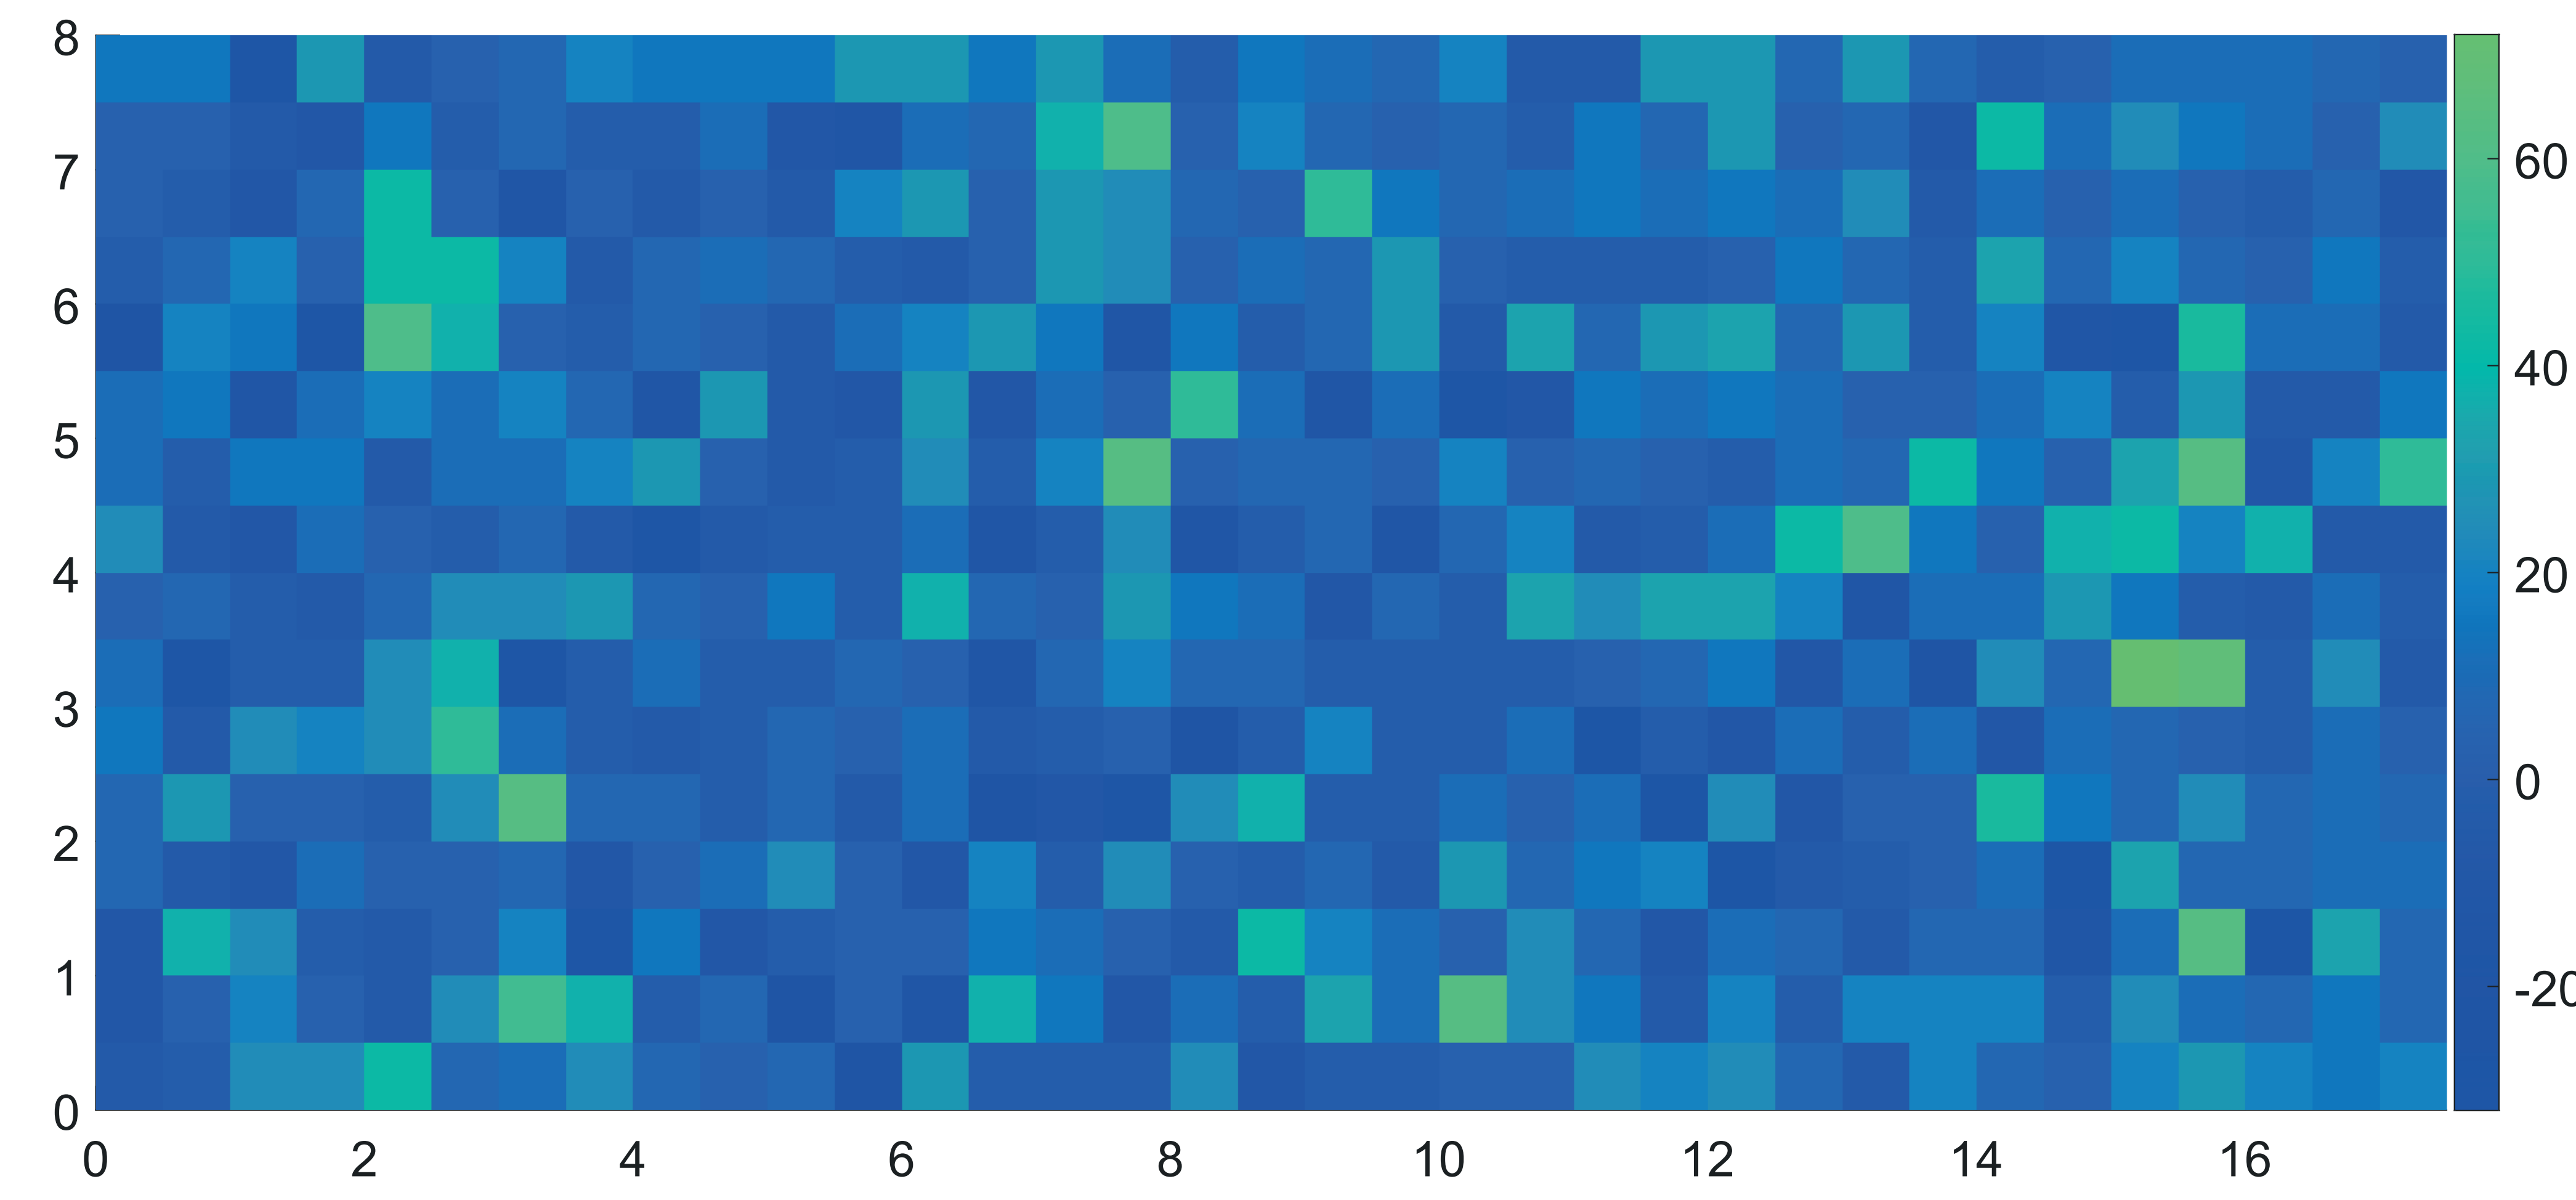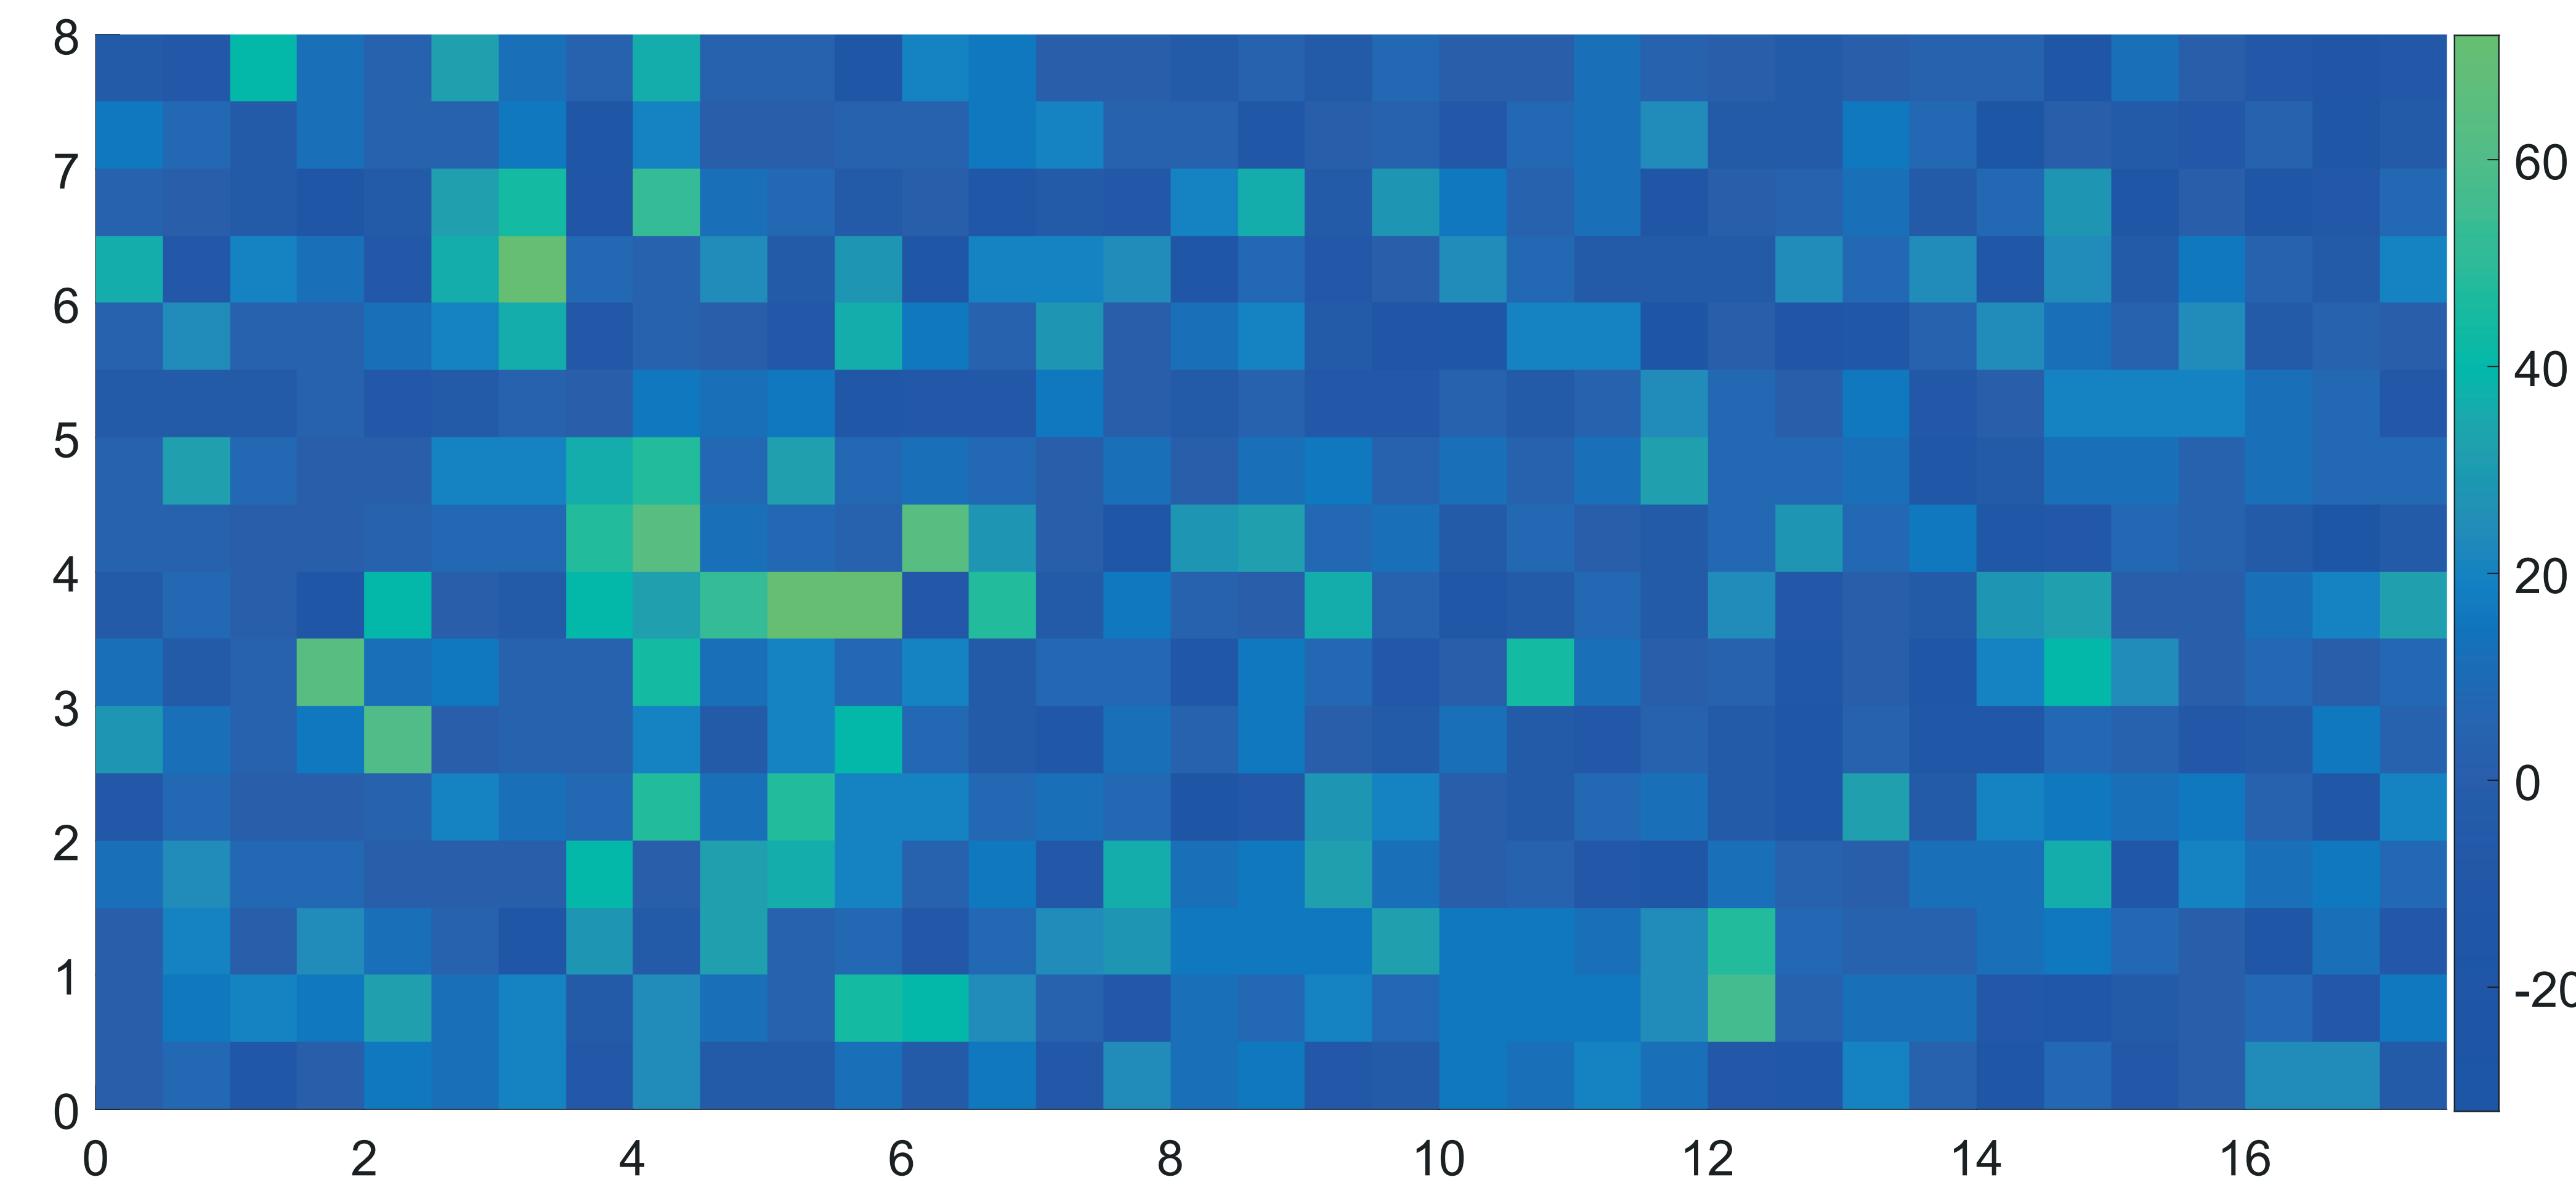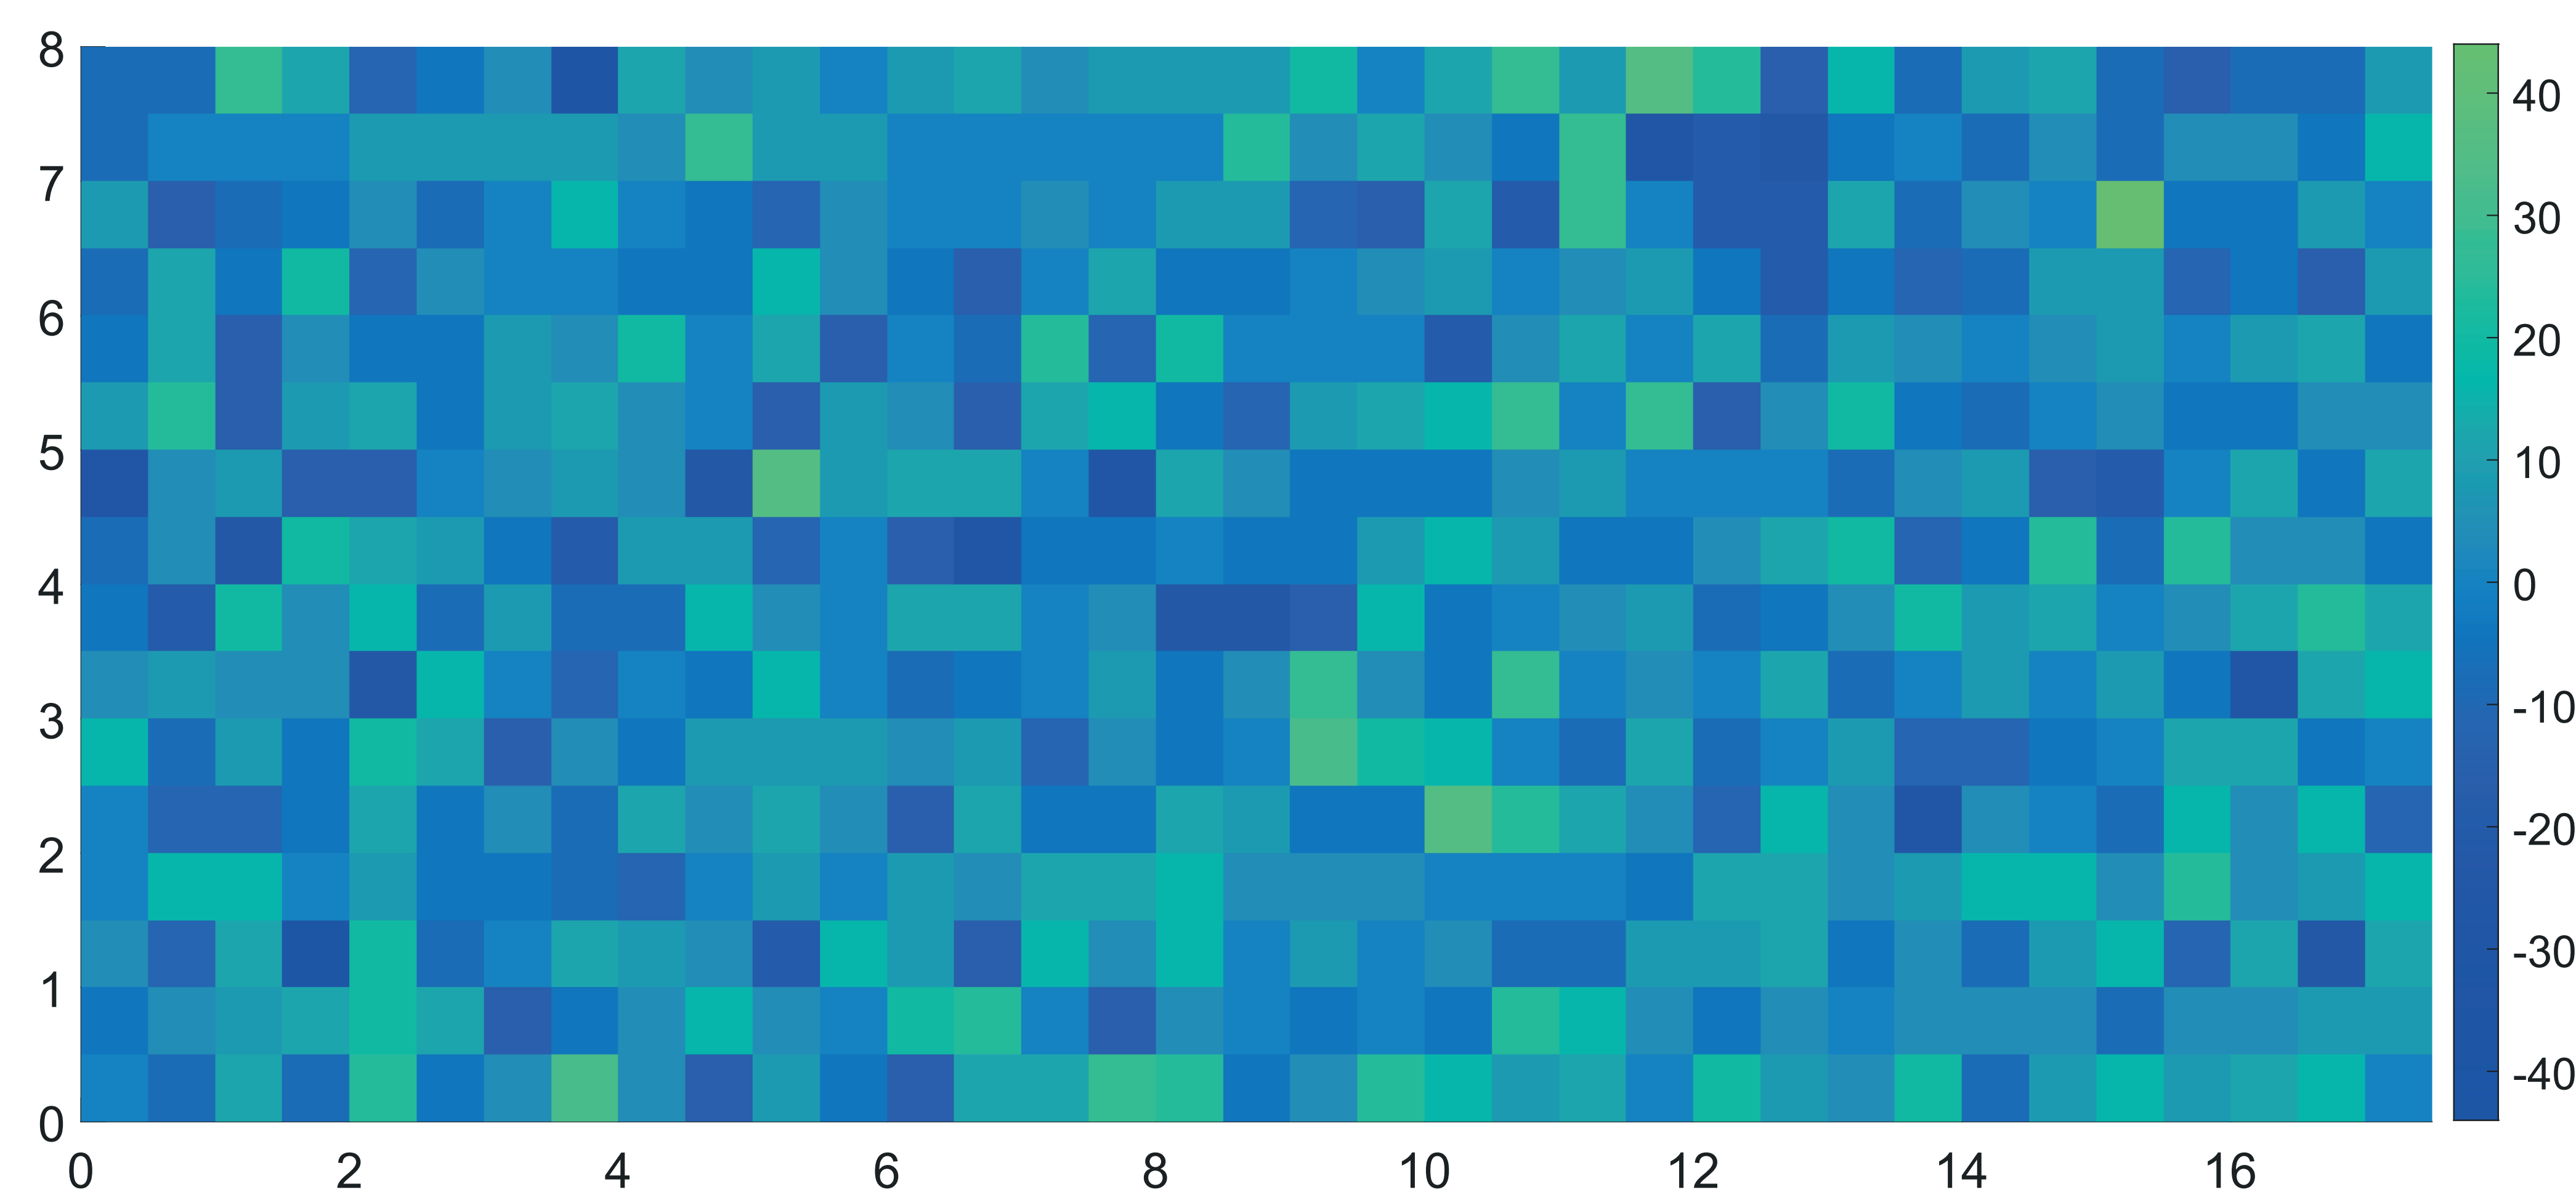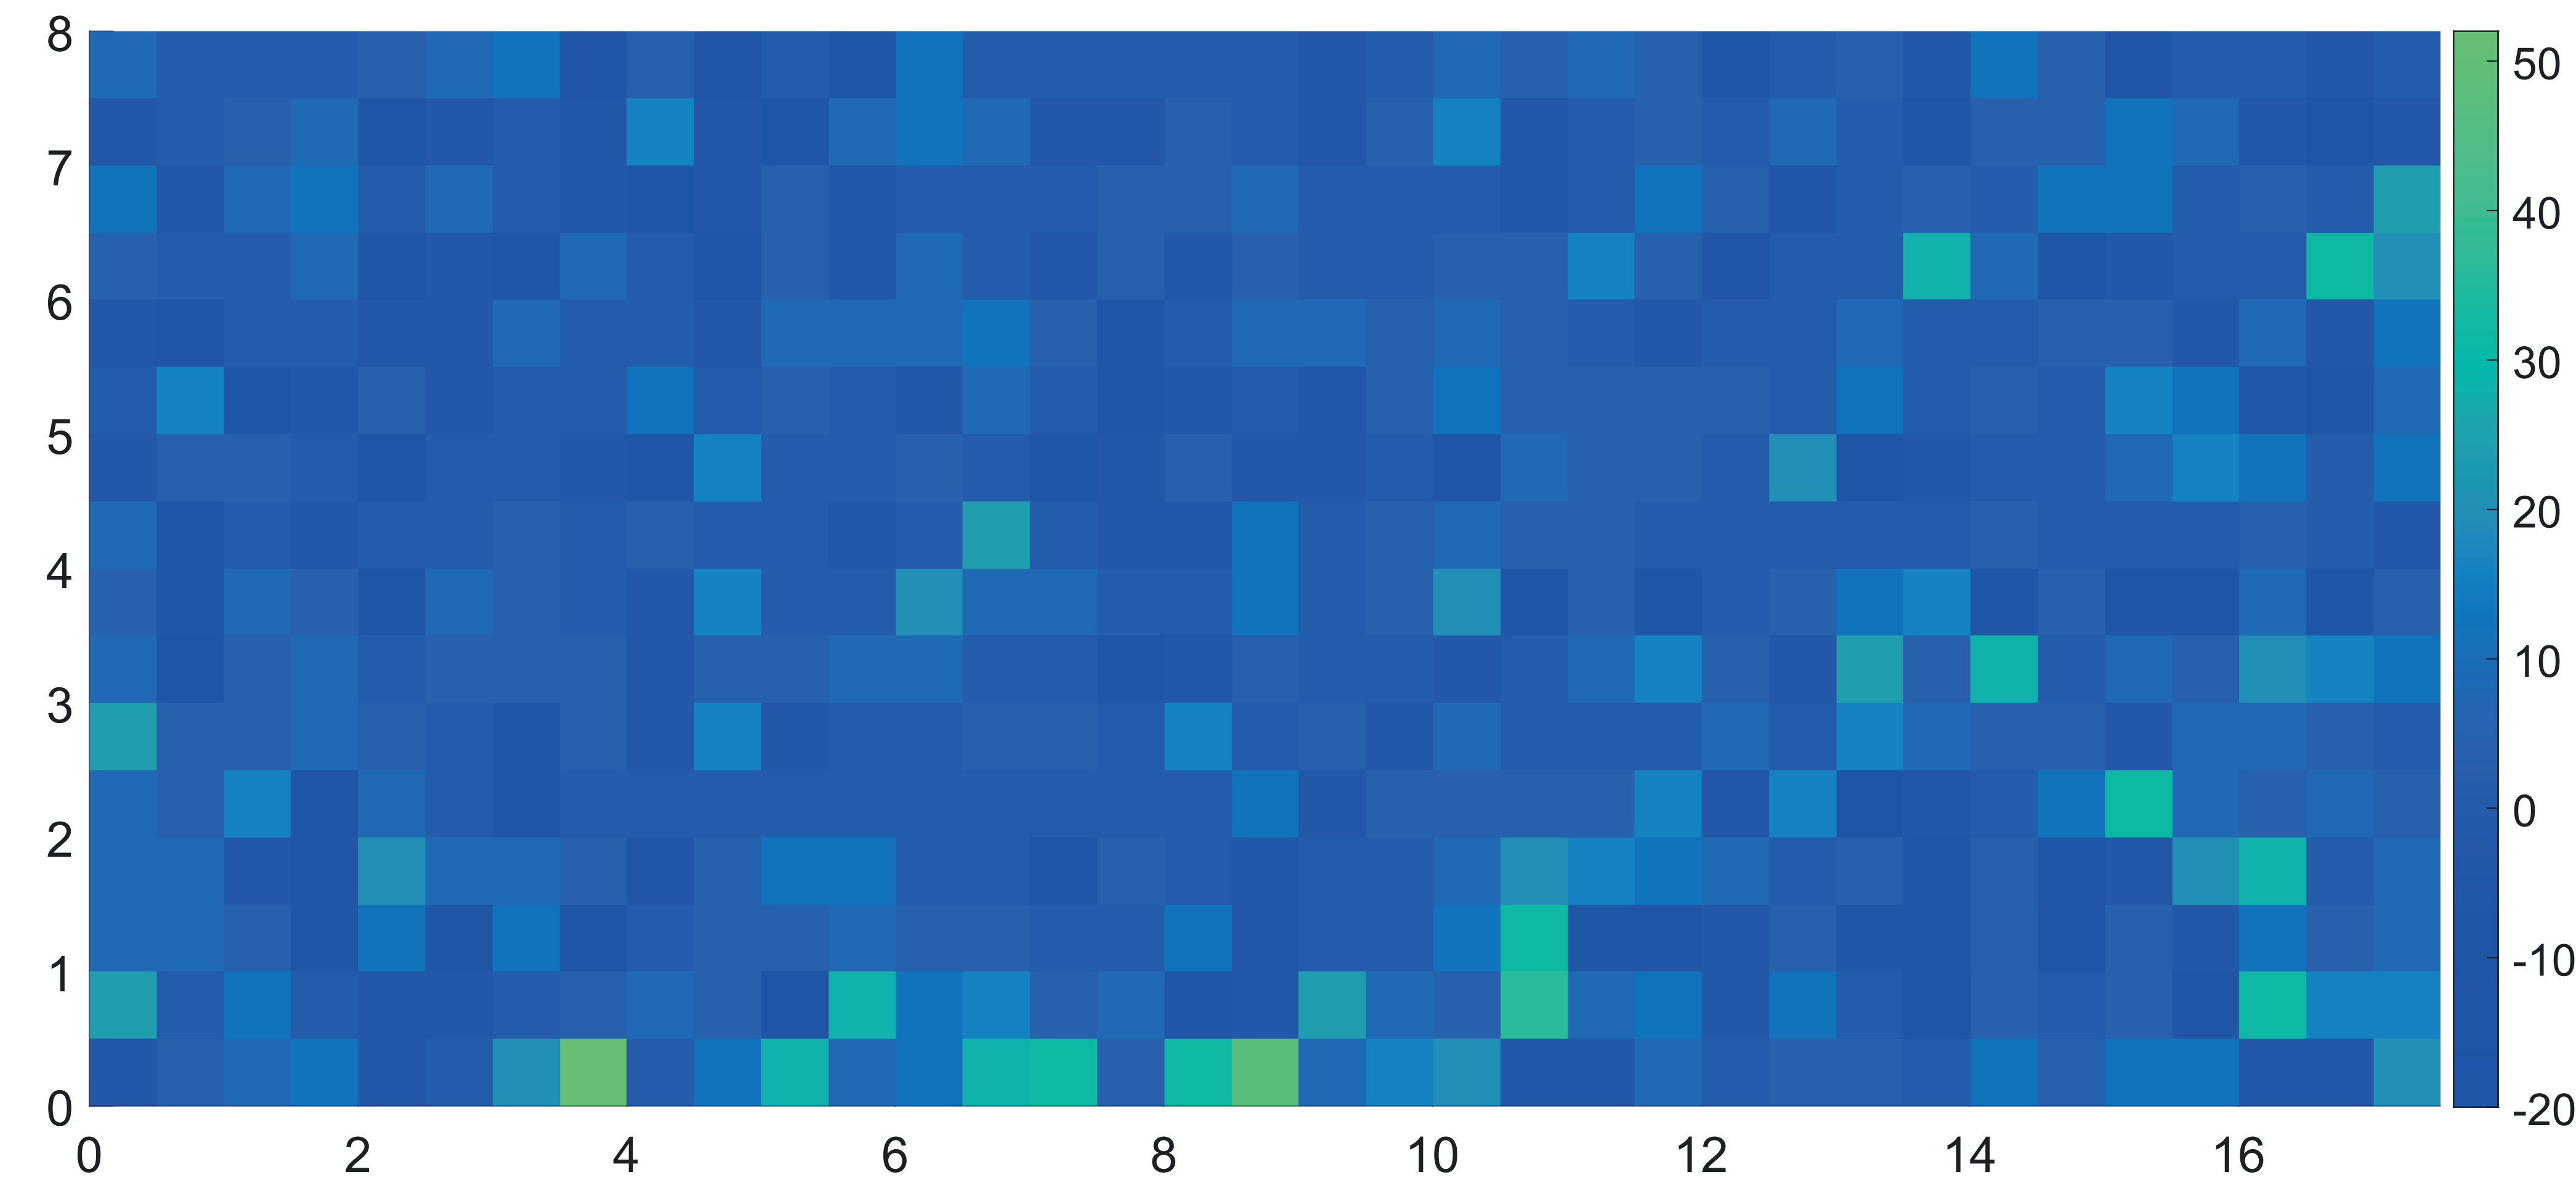

Supplement: Supplementary file 4 [file se-11-1773-2020-supplement.zip]
